# Supplementary material for: Long non-coding RNA Gm15441 attenuates hepatic inflammasome activation in response to PPARA agonism and fasting
Source: PubMed Central journal article supplement (PMC7673042; doi:10.1038/s41467-020-19554-7), 2020-11-17
Supplement: 41467_2020_19554_MOESM3_ESM.pdf [file 41467_2020_19554_MOESM3_ESM.pdf]

**Supplementary Data 1. Differential expression analysis of RefSeq genes.**

WY, WY-14643; Resp, Response; WT, *Ppara*<sup>+/+</sup>; KO, *Ppara*<sup>-/-</sup>

|           | WY<br>Resp.<br>WT<br>liver | WY<br>Resp.<br>KO<br>liver |         | WY<br>Resp.<br>WT<br>liver | WY<br>Resp.<br>KO<br>liver |             | WY<br>Resp.<br>WT<br>liver | WY<br>Resp.<br>KO<br>liver |
|-----------|----------------------------|----------------------------|---------|----------------------------|----------------------------|-------------|----------------------------|----------------------------|
| Gene ID   | Exp.<br>No. 332            | Exp.<br>No. 334            | Gene ID | Exp.<br>No. 332            | Exp.<br>No. 334            | Gene ID     | Exp.<br>No. 332            | Exp. No. 334               |
| FAM47E    | Down                       | Down                       | SULT1A1 | Down                       | 0                          | PSMA5       | Up                         | 0                          |
| XAF1      | Down                       | Down                       | TMEM19  | Down                       | 0                          | SLC27A<br>1 | Up                         | 0                          |
| GM3776    | Down                       | Down                       | ANTXR2  | Down                       | 0                          | SLC27A<br>2 | Up                         | 0                          |
| SYTL1     | Down                       | Down                       | ASL     | Down                       | 0                          | VNN3        | Up                         | 0                          |
| SUCNR1    | Down                       | Down                       | GPR110  | Down                       | 0                          | SLC27A<br>4 | Up                         | 0                          |
| CLIC5     | Down                       |                            | FGG     | Down                       | 0                          | ABCD2       | Up                         | 0                          |
| HAMP2     | Down                       | Down                       | IFI44   | Down                       | 0                          | COPS6       | Up                         | 0                          |
| MEG3      | Down                       | Down                       | ZBTB48  | Down                       | 0                          | ACOT1       | Up                         | 0                          |
| RAD51B    | Up                         | Down                       | C8B     | Down                       | 0                          | EXO1        | Up                         | 0                          |
| HSPA1A    | Up                         | Down                       | CES2A   | Down                       | 0                          | CFD         | Up                         | 0                          |
| SERPINA7  | Up                         | Down                       | TRF     | Down                       | 0                          | ADRA1<br>A  | Up                         | 0                          |
| XLR4A     | 0                          | Down                       | RDH5    | Down                       | 0                          | ADRB3       | Up                         | 0                          |
| PIK3C2B   | 0                          | Down                       | AKR1C14 | Down                       | 0                          | HPRT        | Up                         | 0                          |
| 4833420G1 |                            |                            |         |                            |                            |             |                            |                            |
| 7RIK      | 0                          | Down                       | PLA1A   | Down                       | 0                          | HSPA1L      | Up                         | 0                          |
| MUP19     | 0                          | Down                       | IL1RAP  | Down                       | 0                          | HSPH1       | Up                         | 0                          |
| MUP12     | 0                          | Down                       | CYP2C50 | Down                       | 0                          | HSPB1       | Up                         | 0                          |
| GSTA1     | 0                          | Down                       | FUT10   | Down                       | 0                          | NR4A2       | Up                         | 0                          |
| MME       | 0                          | Down                       | RGS3    | Down                       | 0                          | SEMA5<br>B  | Up                         | 0                          |
| CYP46A1   | 0                          | Down                       | BMF     | Down                       | 0                          | VLDLR       | Up                         | 0                          |
| IHH       | 0                          | Down                       | PRAF2   | Down                       | 0                          | SGK2        | Up                         | 0                          |
| REC114    | 0                          | Down                       | SARDH   | Down                       | 0                          | CHAF1A      | Up                         | 0                          |
| MTUS2     | 0                          | Down                       | TNIP2   | Down                       | 0                          | PDK4        | Up                         | 0                          |
| SLC8A3    | 0                          | Down                       | UGP2    | Down                       | 0                          | PMM1        | Up                         | 0                          |
| SUGCT     | 0                          | Down                       | VASN    | Down                       | 0                          | PDE7B       | Up                         | 0                          |
| FMR1NB    | 0                          | Down                       | SUSD4   | Down                       | 0                          | MFI2        | Up                         | 0                          |
| ACPP      | 0                          | Down                       | CBX7    | Down                       | 0                          | PTPLA       | Up                         | 0                          |
| MALAT1    | 0                          | Down                       | PPP1R1B | Down                       | 0                          | ACOX1       | Up                         | 0                          |
| A630020A0 |                            |                            |         |                            |                            |             |                            |                            |
| 6         | 0                          | Down                       | SLC7A4  | Down                       | 0                          | HUNK        | Up                         | 0                          |
| 3010033K0 |                            |                            |         |                            |                            |             |                            |                            |
| 7RIK      | 0                          | Down                       | CBS     | Down                       | 0                          | NAP1L1      | Up                         | 0                          |

|            |      |    |             |      |   |        |    |   |
|------------|------|----|-------------|------|---|--------|----|---|
| MYOM3      | Down | Up | SLC22A7     | Down | 0 | AQP3   | Up | 0 |
| SAA1       | Down | Up | BC021614    | Down | 0 | MAP3K6 | Up | 0 |
| GBP2B      | Down | Up | HHAT        | Down | 0 | UCHL3  | Up | 0 |
|            |      |    | 6330416G13R |      |   |        |    |   |
| CDKN1A     | Up   | Up | IK          | Down | 0 | CTPS   | Up | 0 |
|            |      |    |             |      |   | RUNDC  |    |   |
| LCN2       | Up   | Up | GCKR        | Down | 0 | 3A     | Up | 0 |
|            |      |    |             |      |   | HSD17B |    |   |
| MT2        | Up   | Up | C1S1        | Down | 0 | 10     | Up | 0 |
| DUSP8      | Up   | Up | FRS3        | Down | 0 | ECH1   | Up | 0 |
| MYC        | Up   | Up | CD207       | Down | 0 | ATXN10 | Up | 0 |
| MT1        | Up   | Up | TIFA        | Down | 0 | GALK1  | Up | 0 |
| PLIN5      | Up   | Up | FRMD4B      | Down | 0 | PLA2G6 | Up | 0 |
| LAD1       | Up   | Up | LRRC3       | Down | 0 | NUDT5  | Up | 0 |
|            |      |    |             |      |   | GAL3ST |    |   |
| INSIG2     | Up   | Up | OASL1       | Down | 0 | 1      | Up | 0 |
| ZFP455     | 0    | Up | AKR1D1      | Down | 0 | FANCA  | Up | 0 |
| MUP13      | 0    | Up | BC089597    | Down | 0 | PKD2L2 | Up | 0 |
| SCARA5     | 0    | Up | GPX6        | Down | 0 | TLR5   | Up | 0 |
|            |      |    |             |      |   | ACADV  |    |   |
| GM1966     | 0    | Up | CYP2C70     | Down | 0 | L      | Up | 0 |
| ARNTL      | 0    | Up | CCM2L       | Down | 0 | TUBA8  | Up | 0 |
| DIO1       | 0    | Up | GBP7        | Down | 0 | FABP1  | Up | 0 |
| SERPINA3   |      |    |             |      |   |        |    |   |
| C          | 0    | Up | DKK4        | Down | 0 | SPAG5  | Up | 0 |
| GEM        | 0    | Up | PPP1R42     | Down | 0 | CTPS2  | Up | 0 |
| MARCO      | 0    | Up | VEPH1       | Down | 0 | TRPM1  | Up | 0 |
| RNASEL     | 0    | Up | PITPNC1     | Down | 0 | SLC4A4 | Up | 0 |
|            |      |    |             |      |   | ST3GAL |    |   |
| DLGAP1     | 0    | Up | GLYAT       | Down | 0 | 6      | Up | 0 |
| LYVE1      | 0    | Up | CTH         | Down | 0 | ABHD2  | Up | 0 |
|            |      |    |             |      |   | SLC23A |    |   |
| CES4A      | 0    | Up | TIFAB       | Down | 0 | 2      | Up | 0 |
|            |      |    |             |      |   | PNLIPR |    |   |
| CD300E     | 0    | Up | ARID5A      | Down | 0 | P1     | Up | 0 |
| TTLL8      | 0    | Up | ANK3        | Down | 0 | PDZRN3 | Up | 0 |
| FAM107A    | 0    | Up | ARHGAP9     | Down | 0 | TYRO3  | Up | 0 |
| MIR8108    | 0    | Up | MGAT2       | Down | 0 | NCAPG  | Up | 0 |
| 9030619P08 |      |    |             |      |   |        |    |   |
| RIK        | 0    | Up | ZDHHC14     | Down | 0 | ACSL4  | Up | 0 |
| CYP2C44    | Down | 0  | FAM129B     | Down | 0 | HEBP2  | Up | 0 |
|            |      |    |             |      |   | MAD2L  |    |   |
| ADAMTS7    | Down | 0  | ITPKA       | Down | 0 | 1      | Up | 0 |
| ZC4H2      | Down | 0  | C8A         | Down | 0 | PDSS1  | Up | 0 |
| SLC13A5    | Down | 0  | LRRK1       | Down | 0 | HAO2   | Up | 0 |
| MAML3      | Down | 0  | UGT2B1      | Down | 0 | PTBP2  | Up | 0 |
| PIK3R6     | Down | 0  | OSBP2       | Down | 0 | PLCE1  | Up | 0 |

|            |      |   |              |      |   |        |    |   |
|------------|------|---|--------------|------|---|--------|----|---|
| AMICA1     | Down | 0 | IGJ          | Down | 0 | PKP1   | Up | 0 |
| I830012O16 |      |   |              |      |   | HSD17B |    |   |
| RIK        | Down | 0 | SLC37A1      | Down | 0 | 12     | Up | 0 |
| ARMCX6     | Down | 0 | CADM4        | Down | 0 | DYNLL1 | Up | 0 |
| ZFP658     | Down | 0 | RDH9         | Down | 0 | FADS2  | Up | 0 |
| MUP21      | Down | 0 | ABCA8A       | Down | 0 | ARL2   | Up | 0 |
| MUP20      | Down | 0 | ACAT3        | Down | 0 | PDCD5  | Up | 0 |
| ECM2       | Down | 0 | HSD3B2       | Down | 0 | MTCH2  | Up | 0 |
| ANKRD6     | Down | 0 | NEURL3       | Down | 0 | RAB9   | Up | 0 |
| SLC22A28   | Down | 0 | OLFM3        | Down | 0 | ABCB9  | Up | 0 |
| SHF        | Down | 0 | NRN1         | Down | 0 | COPZ2  | Up | 0 |
| FAM189B    | Down | 0 | BC029214     | Down | 0 | PTPN4  | Up | 0 |
| G2E3       | Down | 0 | OBP2A        | Down | 0 | UBE2L6 | Up | 0 |
| CYP2C67    | Down | 0 | SYNE4        | Down | 0 | HACL1  | Up | 0 |
| C330021F2  |      |   |              |      |   |        |    |   |
| 3RIK       | Down | 0 | DPYD         | Down | 0 | MTOR   | Up | 0 |
| NTRK2      | Down | 0 | DYNC2LI1     | Down | 0 | FGF21  | Up | 0 |
| CFHR2      | Down | 0 | LIMD2        | Down | 0 | RAET1D | Up | 0 |
|            |      |   |              |      |   | ANKRD  |    |   |
| UGT2B36    | Down | 0 | ITIH5        | Down | 0 | 2      | Up | 0 |
| GM4788     | Down | 0 | TMEM71       | Down | 0 | TRPM5  | Up | 0 |
|            |      |   |              |      |   | SLC25A |    |   |
| ACMSD      | Down | 0 | TXNDC16      | Down | 0 | 20     | Up | 0 |
| BBS1       | Down | 0 | ADAMTS10     | Down | 0 | PLIN4  | Up | 0 |
| LIN7A      | Down | 0 | DDX58        | Down | 0 | XRCC2  | Up | 0 |
| AGAP2      | Down | 0 | PLXNB1       | Down | 0 | ABHD1  | Up | 0 |
|            |      |   |              |      |   | SEC61A |    |   |
| GLS2       | Down | 0 | GBP9         | Down | 0 | 2      | Up | 0 |
|            |      |   |              |      |   | PTPLAD |    |   |
| TMEM231    | Down | 0 | ZFP454       | Down | 0 | 1      | Up | 0 |
| GUCY1A2    | Down | 0 | PODN         | Down | 0 | CALN1  | Up | 0 |
| DNAAF3     | Down | 0 | OLFML1       | Down | 0 | ZBTB32 | Up | 0 |
| ACSL6      | Down | 0 | AI118078     | Down | 0 | USH2A  | Up | 0 |
| 9130409I23 |      |   |              |      |   | CDC42E |    |   |
| RIK        | Down | 0 | DCLK3        | Down | 0 | P5     | Up | 0 |
|            |      |   |              |      |   | HNRNP  |    |   |
| CCDC160    | Down | 0 | SNTG2        | Down | 0 | H1     | Up | 0 |
| TNFSFM13   | Down | 0 | OLFM2        | Down | 0 | PXMP4  | Up | 0 |
| FAM134B    | Down | 0 | APOL9A       | Down | 0 | ARPP19 | Up | 0 |
| GM4841     | Down | 0 | PYHIN1       | Down | 0 | ACKR2  | Up | 0 |
|            |      |   | 1110051M20R  |      |   |        |    |   |
| PNPLA1     | Down | 0 | IK           | Down | 0 | HR     | Up | 0 |
| RIPPLY1    | Down | 0 | DNAIC1       | Down | 0 | FIGNL1 | Up | 0 |
| GM11437    | Down | 0 | ARHGAP26     | Down | 0 | GPRC5B | Up | 0 |
| KCNJ10     | Down | 0 | MMD2         | Down | 0 | SCUBE1 | Up | 0 |
|            |      |   | 2810007J24RI |      |   |        |    |   |
| PARP14     | Down | 0 | K            | Down | 0 | LPAR3  | Up | 0 |

|           |      |   |            |      |   |        |    |   |
|-----------|------|---|------------|------|---|--------|----|---|
| MUP3      | Down | 0 | MYH10      | Down | 0 | PEX19  | Up | 0 |
| CYP2C68   | Down | 0 | CATSPERD   | Down | 0 | PKMYT  |    |   |
| GBP10     | Down | 0 | SP110      | Down | 0 | 1      | Up | 0 |
| GBP11     | Down | 0 | ATP6V0D2   | Down | 0 | ASPA   | Up | 0 |
| URAD      | Down | 0 | GSAP       | Down | 0 | TOR3A  | Up | 0 |
| ARRDC3    | Down | 0 | FAM26F     | Down | 0 | PALMD  | Up | 0 |
| HSD11B1   | Down | 0 | OSBPL8     | Down | 0 | NDC80  | Up | 0 |
| SCIMP     | Down | 0 | MRGPRE     | Down | 0 | CML5   | Up | 0 |
| SLC1A2    | Down | 0 | SNHG11     | Down | 0 | HILPDA | Up | 0 |
| BRDT      | Down | 0 | ARHGAP18   | Down | 0 | ISYNA1 | Up | 0 |
| CPS1      | Down | 0 | LRTM1      | Down | 0 | CROT   | Up | 0 |
| ATP8B4    | Down | 0 | SLC22A30   | Down | 0 | EHHAD  |    |   |
| SETDB2    | Down | 0 | SLC17A4    | Down | 0 | H      | Up | 0 |
| KCNT2     | Down | 0 | CAMK1D     | Down | 0 | PANK1  | Up | 0 |
| CCNO      | Down | 0 | KALRN      | Down | 0 | ALG14  | Up | 0 |
| GPAT2     | Down | 0 | SLC41A2    | Down | 0 | ASF1B  | Up | 0 |
| DHTKD1    | Down | 0 | EIF5A2     | Down | 0 | RTN4   | Up | 0 |
| HTRA4     | Down | 0 | MKX        | Down | 0 | GINS4  | Up | 0 |
| CCDC88B   | Down | 0 | D630003M21 |      |   | HSDL2  | Up | 0 |
| CES1B     | Down | 0 | RIK        | Down | 0 | TNFRSF |    |   |
| METTL7A3  | Down | 0 | VGLL4      | Down | 0 | 23     | Up | 0 |
| SRPX2     | Down | 0 | E2F2       | Down | 0 | FABP4  | Up | 0 |
| FETUB     | Down | 0 | FAM198A    | Down | 0 | MTAP   | Up | 0 |
| NDUFA4L2  | Down | 0 | COLGALT2   | Down | 0 | EVPL   | Up | 0 |
| F830016B0 |      |   | PREX1      | Down | 0 | MRPL17 | Up | 0 |
| 8RIK      | Down | 0 | KLHL23     | Down | 0 | ABHD6  | Up | 0 |
| CYP2C69   | Down | 0 | TMEM67     | Down | 0 | NDUFA  |    |   |
| CYP2D11   | Down | 0 | ZFP334     | Down | 0 | 3      | Up | 0 |
| CYP3A59   | Down | 0 | VTCN1      | Down | 0 | CHCHD  |    |   |
| GAS7      | Down | 0 | NECAB1     | Down | 0 | 6      | Up | 0 |
| NOS1AP    | Down | 0 | FAM65B     | Down | 0 | DNAJC1 |    |   |
| FGA       | Down | 0 | CREB3L2    | Down | 0 | 5      | Up | 0 |
| CMAH      | Down | 0 | DPY19L3    | Down | 0 | AIG1   | Up | 0 |
| NCAM2     | Down | 0 | ZFP385B    | Down | 0 | CENPP  | Up | 0 |
| CEACAM2   | Down | 0 | LRRC4C     | Down | 0 | APTX   | Up | 0 |
| SHANK2    | Down | 0 | GULO       | Down | 0 | SPC25  | Up | 0 |
| LAIR1     | Down | 0 | EGFLAM     | Down | 0 | PNKD   | Up | 0 |
| FCGBP     | Down | 0 | SCAI       | Down | 0 | NDUFB3 | Up | 0 |
| WISP3     | Down | 0 | TMEM241    | Down | 0 | ZWINT  | Up | 0 |
|           |      |   |            |      |   | GEMIN2 | Up | 0 |
|           |      |   |            |      |   | MAP1L  |    |   |
|           |      |   |            |      |   | C3A    | Up | 0 |
|           |      |   |            |      |   | ASB17  | Up | 0 |
|           |      |   |            |      |   | RNF186 | Up | 0 |
|           |      |   |            |      |   | ETFDH  | Up | 0 |

|           |      |   |              |      |   |          |    |   |
|-----------|------|---|--------------|------|---|----------|----|---|
| NUCB2     | Down | 0 | AI182371     | Down | 0 | LONP2    | Up | 0 |
| GM12250   | Down | 0 | PLD4         | Down | 0 | BAIAP2   |    |   |
| HSBP1L1   | Down | 0 | TNFRSF14     | Down | 0 | L1       | Up | 0 |
| BC024139  | Down | 0 | CAR5B        | Down | 0 | DSN1     | Up | 0 |
| PPFIA4    | Down | 0 | NOSTRIN      | Down | 0 | SH3D21   | Up | 0 |
| TGTP2     | Down | 0 | PIK3R3       | Down | 0 | CAND2    | Up | 0 |
| CES3B     | Down | 0 | DSG1C        | Down | 0 | MASTL    | Up | 0 |
| MYO1B     | Down | 0 | GSTP2        | Down | 0 | ACBD4    | Up | 0 |
| TTBK1     | Down | 0 | NFASC        | Down | 0 | NKAIN1   | Up | 0 |
| ITPRIPL1  | Down | 0 | FAM19A2      | Down | 0 | ARL8B    | Up | 0 |
| PLXDC1    | Down | 0 | SPRN         | Down | 0 | CDT1     | Up | 0 |
| MSL3L2    | Down | 0 | PLK5         | Down | 0 | ZC3H13   | Up | 0 |
| LY6E      | Down | 0 | FAT4         | Down | 0 | RETSAT   | Up | 0 |
| PHF11C    | Down | 0 | WFDC21       | Down | 0 | DECR1    | Up | 0 |
| IGLON5    | Down | 0 | FAM229B      | Down | 0 | MMD      | Up | 0 |
| 3110052M0 |      |   |              |      |   | AGPAT2   | Up | 0 |
| 2RIK      | Down | 0 | FAM25C       | Down | 0 | SLC25A   |    |   |
| KLHL33    | Down | 0 | GBP6         | Down | 0 | 30       | Up | 0 |
| APOL9B    | Down | 0 | LZTS3        | Down | 0 | LSM3     | Up | 0 |
|           |      |   |              |      |   | PLL      | Up | 0 |
|           |      |   |              |      |   | PPP2R2   |    |   |
| BDH2      | Down | 0 | RANBP3L      | Down | 0 | D        | Up | 0 |
| LRRC56    | Down | 0 | ELMO1        | Down | 0 | CELA3B   | Up | 0 |
| LOC100038 |      |   |              |      |   |          |    |   |
| 947       | Down | 0 | CES2B        | Down | 0 | SUMF2    | Up | 0 |
|           |      |   | 4430402118RI |      |   |          |    |   |
| CCDC162   | Down | 0 | K            | Down | 0 | TUBB6    | Up | 0 |
| GPR155    | Down | 0 | B4GALNT3     | Down | 0 | PPCS     | Up | 0 |
| GM7694    | Down | 0 | HCRTR2       | Down | 0 | ZWILCH   | Up | 0 |
| LOC100048 |      |   |              |      |   | 3010026  |    |   |
| 884       | Down | 0 | SERPINA11    | Down | 0 | O09RIK   | Up | 0 |
| MUP16     | Down | 0 | CYP2D12      | Down | 0 | DCAKD    | Up | 0 |
| MUP17     | Down | 0 | KNG2         | Down | 0 | CDCA8    | Up | 0 |
| H2-Q9     | Down | 0 | CYP2C54      | Down | 0 | NHP2     | Up | 0 |
|           |      |   |              |      |   | FAM195   |    |   |
| AI607873  | Down | 0 | H2-AB1       | Down | 0 | A        | Up | 0 |
| SMIM22    | Down | 0 | TES          | Down | 0 | GGCT     | Up | 0 |
| BIN2      | Down | 0 | ACE          | Down | 0 | ETFB     | Up | 0 |
| C920025E0 |      |   |              |      |   | MOGAT    |    |   |
| 4RIK      | Down | 0 | H2-Q6        | Down | 0 | 1        | Up | 0 |
| AFF3      | Down | 0 | EGFR         | Down | 0 | CGREF1   | Up | 0 |
| DDX60     | Down | 0 | H19          | Down | 0 | FITM1    | Up | 0 |
|           |      |   |              |      |   | COMTD    |    |   |
| PZP       | Down | 0 | GM5424       | Down | 0 | 1        | Up | 0 |
| AATK      | Down | 0 | GM4956       | Down | 0 | GINS1    | Up | 0 |
|           |      |   | SERPINA4-    |      |   | 1700030J |    |   |
| ADRA1B    | Down | 0 | PS1          | Down | 0 | 22RIK    | Up | 0 |

|          |      |   |                           |      |   |                   |    |   |
|----------|------|---|---------------------------|------|---|-------------------|----|---|
| ADRB1    | Down | 0 | CYP2D13                   | Down | 0 | TEN1              | Up | 0 |
| AMD2     | Down | 0 | GM10319                   | Down | 0 | HFE2              | Up | 0 |
| ANG      | Down | 0 | BC029722                  | Down | 0 | TRIP13            | Up | 0 |
| BIRC3    | Down | 0 | MIR99AHG<br>2610035D17R   | Down | 0 | ZSWIM7            | Up | 0 |
| ASS1     | Down | 0 | IK                        | Down | 0 | ANXA13            | Up | 0 |
| CIITA    | Down | 0 | BC024386                  | Down | 0 | TMEM1<br>47       | Up | 0 |
| CAR8     | Down | 0 | RIAN                      | Down | 0 | KRTCA<br>P3       | Up | 0 |
| CAR3     | Down | 0 | MIRG<br>1700018L02RI      | Down | 0 | 2010003<br>K11RIK | Up | 0 |
| SERPINA6 | Down | 0 | K<br>MARCKSL1-<br>PS4     | Down | 0 | APITD1            | Up | 0 |
| CD37     | Down | 0 | SNHG12                    | Down | 0 | NT5DC2            | Up | 0 |
| CD48     | Down | 0 | 4930581F22RI              | Down | 0 | GOLM1             | Up | 0 |
| CFI      | Down | 0 | K                         | Down | 0 | LYSMD<br>2        | Up | 0 |
| CHRM1    | Down | 0 | MIR24-1                   | Down | 0 | GPATC<br>H2L      | Up | 0 |
| DMBT1    | Down | 0 | MIR22                     | Down | 0 | ATAD2             | Up | 0 |
| CYBA     | Down | 0 | MIR568                    | Down | 0 | QPCT              | Up | 0 |
| CYP26A1  | Down | 0 | MIR22HG<br>1500017E21RI   | Down | 0 | SLC25A<br>33      | Up | 0 |
| CYP2A5   | Down | 0 | K                         | Down | 0 | FAM213<br>A       | Up | 0 |
| CYP2C29  | Down | 0 | ADH6-PS1                  | Down | 0 | GFOD2             | Up | 0 |
| CYP2F2   | Down | 0 | CYP2C53-PS<br>5430416N02R | Down | 0 | KDSR              | Up | 0 |
| CYP3A11  | Down | 0 | IK<br>A730020M07          | Down | 0 | 4921507<br>P07RIK | Up | 0 |
| CYP7B1   | Down | 0 | RIK                       | Down | 0 | MICALC<br>L       | Up | 0 |
| DACH1    | Down | 0 | GM16548<br>C730036E19R    | Down | 0 | GPR39             | Up | 0 |
| GADD45A  | Down | 0 | IK<br>0610005C13R         | Down | 0 | RFX4              | Up | 0 |
| EEF2K    | Down | 0 | IK<br>2310001H17R         | Down | 0 | PEX1              | Up | 0 |
| CELA2A   | Down | 0 | IK                        | Down | 0 | FAM110<br>C       | Up | 0 |
| ENPEP    | Down | 0 | KANTR<br>2310040G24R      | Down | 0 | METTTL7<br>B      | Up | 0 |
| CES1C    | Down | 0 | IK                        | Down | 0 | SLC41A<br>3       | Up | 0 |
| ESR1     | Down | 0 | GM16793                   | Down | 0 | ARHGE<br>F3       | Up | 0 |
| FGFR3    | Down | 0 | GM19522<br>3110045C21R    | Down | 0 | VWA8              | Up | 0 |
| FGFR4    | Down | 0 | IK                        | Down | 0 | SYCE2             | Up | 0 |

|         |      |   |              |      |   |         |    |   |
|---------|------|---|--------------|------|---|---------|----|---|
| FMO3    | Down | 0 | GM10804      | Down | 0 | CENPU   | Up | 0 |
| FST     | Down | 0 | GM12718      | Down | 0 | ACSL5   | Up | 0 |
| FZD8    | Down | 0 | 4930480G23R  |      |   |         |    |   |
| GNA14   | Down | 0 | IK           | Down | 0 | APMAP   | Up | 0 |
| GNAT1   | Down | 0 | GDAP10       | Down | 0 | EPN3    | Up | 0 |
| GNAT2   | Down | 0 | 1700012D01R  |      |   |         |    |   |
| GPLD1   | Down | 0 | IK           | Down | 0 | PAQR7   | Up | 0 |
| GRM8    | Down | 0 | GM17644      | Down | 0 | ENDOD   |    |   |
| CXCL1   | Down | 0 | 2900009J06RI |      |   | 1       | Up | 0 |
| GSTA2   | Down | 0 | K            | Down | 0 | WDR73   | Up | 0 |
| GSTM2   | Down | 0 | 2900076A07R  |      |   | ZDHHC   |    |   |
| GSTM6   | Down | 0 | IK           | Down | 0 | 13      | Up | 0 |
| GUCA1A  | Down | 0 | 5730435O14R  |      |   |         |    |   |
| H2-BL   | Down | 0 | IK           | Down | 0 | DDX28   | Up | 0 |
| H2-T24  | Down | 0 | 4933438K21R  |      |   | 1600014 |    |   |
| MR1     | Down | 0 | IK           | Down | 0 | K23RIK  | Up | 0 |
| FOXQ1   | Down | 0 | 1700028E10RI |      |   | SLC39A  |    |   |
| HSD3B5  | Down | 0 | K            | Down | 0 | 5       | Up | 0 |
| SDC2    | Down | 0 | 0610031O16R  |      |   |         |    |   |
| HTR1D   | Down | 0 | IK           | Down | 0 | SLC35F2 | Up | 0 |
| IFI47   | Down | 0 | 4930470H14R  |      |   |         |    |   |
| IFIT1   | Down | 0 | IK           | Down | 0 | SULF2   | Up | 0 |
| IL12RB1 | Down | 0 | 1700092C10R  |      |   |         |    |   |
| IL15    | Down | 0 | IK           | Down | 0 | CHAF1B  | Up | 0 |
| IL18    | Down | 0 | GM16063      | Down | 0 | DDHD2   | Up | 0 |
| IL1B    | Down | 0 | AW112010     | Down | 0 | PYGO1   | Up | 0 |
| INHBA   | Down | 0 | GM20319      | Down | 0 | 2610020 |    |   |
| LAG3    | Down | 0 | MIR7219      | Down | 0 | H08RIK  | Up | 0 |
| BLNK    | Down | 0 | 4930459C07R  |      |   | CENPN   | Up | 0 |
| MASP1   | Down | 0 | IK           | Down | 0 | CDA     | Up | 0 |
| MUG1    | Down | 0 | ZFP941       | Up   | 0 | ORAOV   |    |   |
| MUG2    | Down | 0 | PLEKHA8      | Up   | 0 | 1       | Up | 0 |
|         |      |   | UTP14B       | Up   | 0 | WDR89   | Up | 0 |
|         |      |   | NAT8L        | Up   | 0 | PRCP    | Up | 0 |
|         |      |   | RAB44        | Up   | 0 | ANGPT   |    |   |
|         |      |   | TACC2        | Up   | 0 | L1      | Up | 0 |
|         |      |   | SLC25A42     | Up   | 0 | TMEM1   |    |   |
|         |      |   | RNASE13      | Up   | 0 | 35      | Up | 0 |
|         |      |   | HSPB6        | Up   | 0 | SASS6   | Up | 0 |
|         |      |   | HS3ST6       | Up   | 0 | BMPER   | Up | 0 |
|         |      |   | WFDC16       | Up   | 0 | 1700056 |    |   |
|         |      |   | E2F8         | Up   | 0 | E22RIK  | Up | 0 |
|         |      |   | NRP          | Up   | 0 | FCF1    | Up | 0 |
|         |      |   |              |      |   | PHF19   | Up | 0 |
|         |      |   |              |      |   | RIN2    | Up | 0 |
|         |      |   |              |      |   | GRIP1   | Up | 0 |
|         |      |   |              |      |   | CEP55   | Up | 0 |

|               |      |   |                      |    |   |                   |    |   |
|---------------|------|---|----------------------|----|---|-------------------|----|---|
| NAB2          | Down | 0 | LMAN2L               | Up | 0 | ACOT12            | Up | 0 |
| NFKBIE        | Down | 0 | RSAD1                | Up | 0 | CCDC3             | Up | 0 |
| MYCN          | Down | 0 | SCN4B                | Up | 0 | XRCC3             | Up | 0 |
| NPTX1         | Down | 0 | TRIM6                | Up | 0 | TMED5             | Up | 0 |
| ORM1          | Down | 0 | GM4952               | Up | 0 | ELOVL7            | Up | 0 |
| OTC           | Down | 0 | SLC25A34             | Up | 0 | LRRC48            | Up | 0 |
| PAH           | Down | 0 | 4930404N11R<br>IK    | Up | 0 | SPATA1<br>7       | Up | 0 |
| PDE9A         | Down | 0 | ZMYND12              | Up | 0 | KBTBD1<br>1       | Up | 0 |
| TULP2         | Down | 0 | ANKS6                | Up | 0 | CCDC14<br>6       | Up | 0 |
| SERPINF2      | Down | 0 | ADAMTS15             | Up | 0 | FAM183<br>B       | Up | 0 |
| PLSCR2        | Down | 0 | PLA2G4F              | Up | 0 | ACYP2             | Up | 0 |
| PRKG2         | Down | 0 | ZBTB45               | Up | 0 | MORC4             | Up | 0 |
| PIPOX         | Down | 0 | ZFP667               | Up | 0 | 4930402<br>H24RIK | Up | 0 |
| PTGDS         | Down | 0 | SERINC4              | Up | 0 | NLN<br>4930579    | Up | 0 |
| RAC2          | Down | 0 | SNX22                | Up | 0 | G24RIK            | Up | 0 |
| RASA3         | Down | 0 | CDC6                 | Up | 0 | RAB30             | Up | 0 |
| RGS4          | Down | 0 | ENTPD5               | Up | 0 | PREX2             | Up | 0 |
| SCN7A         | Down | 0 | PKNOX2               | Up | 0 | TMEM9<br>8        | Up | 0 |
| CX3CL1        | Down | 0 | SPECC1               | Up | 0 | GSTK1             | Up | 0 |
| ST3GAL1       | Down | 0 | SYBU                 | Up | 0 | DET1              | Up | 0 |
| SLC17A1       | Down | 0 | KLHDC9               | Up | 0 | PPP1R3<br>G       | Up | 0 |
| SLC3A1        | Down | 0 | LRRC14B              | Up | 0 | SLC52A<br>2       | Up | 0 |
| SERPINA1<br>A | Down | 0 | NTRK1                | Up | 0 | STYXL1            | Up | 0 |
| SERPINA1<br>B | Down | 0 | 1700039E15RI<br>K    | Up | 0 | SPATC1<br>L       | Up | 0 |
| SERPINA1<br>C | Down | 0 | YEATS2               | Up | 0 | SRXN1             | Up | 0 |
| SERPINA1<br>E | Down | 0 | FANCD2               | Up | 0 | DTL               | Up | 0 |
| SERPINA3<br>N | Down | 0 | 8-Mar<br>5031439G07R | Up | 0 | UNC5B             | Up | 0 |
| SERPINA3<br>M | Down | 0 | IK                   | Up | 0 | TTL11             | Up | 0 |
| SERPINB9      | Down | 0 | UAP1L1               | Up | 0 | CALR3             | Up | 0 |
| SLC6A6        | Down | 0 | FHDC1                | Up | 0 | ST5<br>2700049    | Up | 0 |
| TBXA2R        | Down | 0 | ABCC4                | Up | 0 | A03RIK            | Up | 0 |
| PHLDA1        | Down | 0 | NLRP12               | Up | 0 | TICRR             | Up | 0 |



|         |      |   |          |    |   |        |    |   |
|---------|------|---|----------|----|---|--------|----|---|
| TERT    | Down | 0 | BC048644 | Up | 0 | MRAP   | Up | 0 |
| THRSP   | Down | 0 | LRRC8B   | Up | 0 | KCNK10 | Up | 0 |
| TNNC1   | Down | 0 | ZCCHC16  | Up | 0 | POLQ   | Up | 0 |
| TNFSF10 | Down | 0 | ZFP872   | Up | 0 | SLA2   | Up | 0 |
| UOX     | Down | 0 | THNSL2   | Up | 0 | LBH    | Up | 0 |
| WAS     | Down | 0 | RUFY4    | Up | 0 | PLB1   | Up | 0 |
| ZAP70   | Down | 0 | TMEM136  | Up | 0 | HTRA3  | Up | 0 |
| CHRNB1  | Down | 0 | PNLDC1   | Up | 0 | ZFP449 | Up | 0 |
| ADCY9   | Down | 0 | ST3GAL5  | Up | 0 | NOL3   | Up | 0 |
|         |      |   |          |    |   | EFCAB1 |    |   |
| AVIL    | Down | 0 | CACNB4   | Up | 0 | 1      | Up | 0 |
| ALAS2   | Down | 0 | TOMM40L  | Up | 0 | ARMC9  | Up | 0 |
| ALDOC   | Down | 0 | COL28A1  | Up | 0 | STPG1  | Up | 0 |
| AMD1    | Down | 0 | WDR93    | Up | 0 | WRNIP1 | Up | 0 |
| AKR1B7  | Down | 0 | GM11992  | Up | 0 | DLST   | Up | 0 |
| C3AR1   | Down | 0 | DHRS4    | Up | 0 | ZFP202 | Up | 0 |
| C4B     | Down | 0 | LIPE     | Up | 0 | CNNM1  | Up | 0 |
| CAR1    | Down | 0 | RAD54B   | Up | 0 | NRG4   | Up | 0 |
| CAR11   | Down | 0 | IL1RN    | Up | 0 | DMPK   | Up | 0 |
| CASP3   | Down | 0 | KNTC1    | Up | 0 | ZFP423 | Up | 0 |
| CCRN4L  | Down | 0 | OIP5     | Up | 0 | KRT23  | Up | 0 |
| CD83    | Down | 0 | PROCA1   | Up | 0 | RAB34  | Up | 0 |
| CDH1    | Down | 0 | MUP2     | Up | 0 | NPNT   | Up | 0 |
| CFH     | Down | 0 | CERKL    | Up | 0 | CNNM4  | Up | 0 |
| CHRD    | Down | 0 | BSG      | Up | 0 | AMN    | Up | 0 |
| CISH    | Down | 0 | NRP2     | Up | 0 | OPHN1  | Up | 0 |
|         |      |   |          |    |   | FAM126 |    |   |
| CLCN2   | Down | 0 | PTPN6    | Up | 0 | A      | Up | 0 |
| CCR3    | Down | 0 | SLC16A5  | Up | 0 | TAC4   | Up | 0 |
| CCR5    | Down | 0 | THG1L    | Up | 0 | IMPA2  | Up | 0 |
|         |      |   |          |    |   | HSD17B |    |   |
| CNP     | Down | 0 | DDIAS    | Up | 0 | 11     | Up | 0 |
| CYP1A1  | Down | 0 | UNC79    | Up | 0 | RAD51C | Up | 0 |
| CYP1A2  | Down | 0 | EFCAB3   | Up | 0 | RIMS2  | Up | 0 |
|         |      |   |          |    |   | HIST2H |    |   |
| CYP2C37 | Down | 0 | ADAMTS14 | Up | 0 | 3C2    | Up | 0 |
| CYP2C40 | Down | 0 | OXTR     | Up | 0 | DEF8   | Up | 0 |
| DBT     | Down | 0 | RAP1GAP  | Up | 0 | PAWR   | Up | 0 |
| LEFTY1  | Down | 0 | NIPAL1   | Up | 0 | GRHPR  | Up | 0 |
|         |      |   |          |    |   | RNF144 |    |   |
| SAMD9L  | Down | 0 | ZFP174   | Up | 0 | A      | Up | 0 |
| F7      | Down | 0 | TLN2     | Up | 0 | ACO2   | Up | 0 |
| FCGR1   | Down | 0 | UGGT2    | Up | 0 | PASK   | Up | 0 |
|         |      |   |          |    |   | ACAA1  |    |   |
| FES     | Down | 0 | MFSD7B   | Up | 0 | A      | Up | 0 |
| FOS     | Down | 0 | MUP6     | Up | 0 | KIRREL | Up | 0 |

|        |      |   |             |    |   |         |    |   |
|--------|------|---|-------------|----|---|---------|----|---|
| GAMT   | Down | 0 | DGKH        | Up | 0 | PAPLN   | Up | 0 |
| GHR    | Down | 0 | MYH7B       | Up | 0 | ROGDI   | Up | 0 |
| GM2A   | Down | 0 | CISD3       | Up | 0 | P2RY14  | Up | 0 |
| GNMT   | Down | 0 | FAM131C     | Up | 0 | ACOT8   | Up | 0 |
| GOT1   | Down | 0 | CYP4A32     | Up | 0 | SLC5A2  | Up | 0 |
| GSTA4  | Down | 0 | WFIKKN1     | Up | 0 | MEF2D   | Up | 0 |
| GSTM1  | Down | 0 | CYP4F17     | Up | 0 | CHRD2L2 | Up | 0 |
|        |      |   |             |    |   | ARHGA   |    |   |
| GSTM3  | Down | 0 | CYP2A22     | Up | 0 | P27     | Up | 0 |
|        |      |   |             |    |   | 4931406 |    |   |
| H2-Q7  | Down | 0 | COL6A6      | Up | 0 | C07RIK  | Up | 0 |
| H2-T10 | Down | 0 | CENPW       | Up | 0 | NCAPG2  | Up | 0 |
| H2-T23 | Down | 0 | CBFA2T3     | Up | 0 | STK17B  | Up | 0 |
| HAL    | Down | 0 | CELF2       | Up | 0 | EHD4    | Up | 0 |
|        |      |   |             |    |   | MMAD    |    |   |
| HC     | Down | 0 | UHRF1       | Up | 0 | HC      | Up | 0 |
| HEXB   | Down | 0 | BC048609    | Up | 0 | SPON2   | Up | 0 |
| IER2   | Down | 0 | PLIN1       | Up | 0 | ACACB   | Up | 0 |
| IFIT3  | Down | 0 | 8-Sep       | Up | 0 | RHOA    | Up | 0 |
|        |      |   | 4930506M07R |    |   |         |    |   |
| IGF1   | Down | 0 | IK          | Up | 0 | CDCP1   | Up | 0 |
|        |      |   |             |    |   | AKR1C1  |    |   |
| IL18BP | Down | 0 | CORIN       | Up | 0 | 8       | Up | 0 |
| IRX1   | Down | 0 | RAD54L      | Up | 0 | NCALD   | Up | 0 |
| KIF9   | Down | 0 | FAM178B     | Up | 0 | LARS    | Up | 0 |
| KLF12  | Down | 0 | MUP8        | Up | 0 | SYT12   | Up | 0 |
| MAFB   | Down | 0 | GM9992      | Up | 0 | ACOT2   | Up | 0 |
| LAMA3  | Down | 0 | ACSS3       | Up | 0 | ACOT3   | Up | 0 |
| LECT1  | Down | 0 | ADTRP       | Up | 0 | ACOT4   | Up | 0 |
| LECT2  | Down | 0 | ALS2CL      | Up | 0 | ELOVL5  | Up | 0 |
|        |      |   |             |    |   | SLC22A  |    |   |
| PSMB8  | Down | 0 | SSC4D       | Up | 0 | 27      | Up | 0 |
| LST1   | Down | 0 | TMEM184A    | Up | 0 | TYMP    | Up | 0 |
| MXD1   | Down | 0 | KIF26B      | Up | 0 | PPP2R4  | Up | 0 |
|        |      |   |             |    |   | PLA2G1  |    |   |
| MBL2   | Down | 0 | MDM1        | Up | 0 | 6       | Up | 0 |
| MPEG1  | Down | 0 | PKP3        | Up | 0 | GALNT2  | Up | 0 |
| MX1    | Down | 0 | RMI2        | Up | 0 | DLGAP5  | Up | 0 |
| NEB    | Down | 0 | LRRC51      | Up | 0 | ACAT1   | Up | 0 |
|        |      |   |             |    |   | CHRNA   |    |   |
| NNMT   | Down | 0 | MINOS1      | Up | 0 | 2       | Up | 0 |
| ORM2   | Down | 0 | EME2        | Up | 0 | CHPT1   | Up | 0 |
|        |      |   |             |    |   | KLHDC   |    |   |
| PIGR   | Down | 0 | PCSK5       | Up | 0 | 8A      | Up | 0 |
|        |      |   |             |    |   | SLC24A  |    |   |
| PPIB   | Down | 0 | MTTP        | Up | 0 | 1       | Up | 0 |
| PRLR   | Down | 0 | MAP3K12     | Up | 0 | NCAPH   | Up | 0 |

|          |      |   |              |    |   |         |    |   |
|----------|------|---|--------------|----|---|---------|----|---|
| PRODH    | Down | 0 | OSBPL3       | Up | 0 | ELMOD   |    |   |
| RGS16    | Down | 0 | TRIM13       | Up | 0 | 3       | Up | 0 |
| SAA2     | Down | 0 | CHADL        | Up | 0 | CSAD    | Up | 0 |
| SAA3     | Down | 0 | DNAH6        | Up | 0 | HIP1R   | Up | 0 |
| SAA4     | Down | 0 | RAD18        | Up | 0 | PEX16   | Up | 0 |
| APCS     | Down | 0 | PPP1R3E      | Up | 0 | LPCAT3  | Up | 0 |
| SCNN1A   | Down | 0 | EDA          | Up | 0 | PRC1    | Up | 0 |
| CCL9     | Down | 0 | RPGR         | Up | 0 | AY0748  |    |   |
| SELP     | Down | 0 | KCNMB3       | Up | 0 | 87      | Up | 0 |
| SEMA3E   | Down | 0 | GM3336       | Up | 0 | ACNAT   |    |   |
| SLC25A14 | Down | 0 | KIFC1        | Up | 0 | 2       | Up | 0 |
| SNAI2    | Down | 0 | DCDC2B       | Up | 0 | BAG2    | Up | 0 |
| SORL1    | Down | 0 | A630076J17RI |    |   | SLC44A  |    |   |
| SERPINA3 |      |   | K            | Up | 0 | 3       | Up | 0 |
| K        | Down | 0 | FER1L5       | Up | 0 | DUOXA   |    |   |
| SERPINB8 | Down | 0 | GM867        | Up | 0 | 1       | Up | 0 |
| TFF3     | Down | 0 | KBTBD12      | Up | 0 | CHTF18  | Up | 0 |
| TGTP1    | Down | 0 | COL12A1      | Up | 0 | DHRS7B  | Up | 0 |
| TNFSF12  | Down | 0 | ITGA10       | Up | 0 | ACOT5   | Up | 0 |
| XIRP1    | Down | 0 | ACADL        | Up | 0 | MFSD7C  | Up | 0 |
| GREM2    | Down | 0 | ACADM        | Up | 0 | IF127L2 |    |   |
| MMP17    | Down | 0 | PLIN2        | Up | 0 | B       | Up | 0 |
| SPRY4    | Down | 0 | ADRA2A       | Up | 0 | HAUS4   | Up | 0 |
| WIF1     | Down | 0 | ALPL         | Up | 0 | SMOX    | Up | 0 |
| MAP2K6   | Down | 0 | ALDH3A2      | Up | 0 | SDCBP2  | Up | 0 |
| HOMER2   | Down | 0 | ALDOA        | Up | 0 | HADHB   | Up | 0 |
| OMD      | Down | 0 | AQP7         | Up | 0 | NXNL1   | Up | 0 |
| AOAH     | Down | 0 | RHOC         | Up | 0 | TOX     | Up | 0 |
| IRF5     | Down | 0 | ATF3         | Up | 0 | GRHL1   | Up | 0 |
| AHSG     | Down | 0 | PHB2         | Up | 0 | CENPI   | Up | 0 |
| C2       | Down | 0 | HRK          | Up | 0 | FANCI   | Up | 0 |
| C9       | Down | 0 | BLM          | Up | 0 | RHBDD   |    |   |
| CD4      | Down | 0 | ANXA2        | Up | 0 | 2       | Up | 0 |
| HAPLN1   | Down | 0 | CALCR        | Up | 0 | KRT79   | Up | 0 |
| FLT3L    | Down | 0 | CCNG2        | Up | 0 | ACAA1   |    |   |
| GSTP1    | Down | 0 | CD36         | Up | 0 | B       | Up | 0 |
|          |      |   |              |    |   | ERCC6L  | Up | 0 |
|          |      |   |              |    |   | HPDL    | Up | 0 |
|          |      |   |              |    |   | OLFR20  | Up | 0 |
|          |      |   |              |    |   | SLCO4A  |    |   |
|          |      |   |              |    |   | 1       | Up | 0 |
|          |      |   |              |    |   | STX3    | Up | 0 |
|          |      |   |              |    |   | SLC18A  |    |   |
|          |      |   |              |    |   | 1       | Up | 0 |
|          |      |   |              |    |   | SLC16A  |    |   |
|          |      |   |              |    |   | 11      | Up | 0 |

|          |      |   |         |    |   |         |    |   |
|----------|------|---|---------|----|---|---------|----|---|
| LIFR     | Down | 0 | SCARB2  | Up | 0 | PHOSPH  |    |   |
| PSMB9    | Down | 0 | CD9     | Up | 0 | O1      | Up | 0 |
| MX2      | Down | 0 | CDK1    | Up | 0 | OPLAH   | Up | 0 |
| ORM3     | Down | 0 | CHEK1   | Up | 0 | CPNE5   | Up | 0 |
| PKLR     | Down | 0 | CHKB    | Up | 0 | SLC36A  |    |   |
| PSMB10   | Down | 0 | CHIL1   | Up | 0 | 2       | Up | 0 |
| TTR      | Down | 0 | CIDEA   | Up | 0 | ADAM3   |    |   |
| FGD2     | Down | 0 | ELOVL3  | Up | 0 | 2       | Up | 0 |
| NAGLU    | Down | 0 | COL11A1 | Up | 0 | GRWD1   | Up | 0 |
| SLCO1A1  | Down | 0 | CPOX    | Up | 0 | CLSTN3  | Up | 0 |
| CYP2G1   | Down | 0 | CRAT    | Up | 0 | BC03086 |    |   |
| LY75     | Down | 0 | CSF2RB  | Up | 0 | 7       | Up | 0 |
| GCAT     | Down | 0 | CTSE    | Up | 0 | FAM102  |    |   |
| TNFRSF19 | Down | 0 | CYCS    | Up | 0 | A       | Up | 0 |
| HEYL     | Down | 0 | CYP17A1 | Up | 0 | CMTM4   | Up | 0 |
| ZFP354C  | Down | 0 | CYP4A14 | Up | 0 | ACSF2   | Up | 0 |
| ENPP2    | Down | 0 | DBI     | Up | 0 | IGSF11  | Up | 0 |
| NOX4     | Down | 0 | DEFB1   | Up | 0 | SPIRE2  | Up | 0 |
| CFHR1    | Down | 0 | ECT2    | Up | 0 | MAB21L  |    |   |
| ISG15    | Down | 0 | ENC1    | Up | 0 | 3       | Up | 0 |
| FBXO17   | Down | 0 | EPHX2   | Up | 0 | CYP4A1  |    |   |
| NT5C     | Down | 0 | EPS8    | Up | 0 | 2B      | Up | 0 |
| SYT3     | Down | 0 | FABP2   | Up | 0 | SLC16A  |    |   |
| C6       | Down | 0 | ACSL1   | Up | 0 | 13      | Up | 0 |
| BOK      | Down | 0 | FAS     | Up | 0 | TMPRSS  |    |   |
| BNIP2    | Down | 0 | FBP2    | Up | 0 | 7       | Up | 0 |
| IRF7     | Down | 0 | SMC2    | Up | 0 | ZC3HA   |    |   |
| PPP1R3C  | Down | 0 | FRAT1   | Up | 0 | V1L     | Up | 0 |
| VAMP5    | Down | 0 | FUT1    | Up | 0 | TBC1D2  |    |   |
| RAB25    | Down | 0 | FZD6    | Up | 0 | 5       | Up | 0 |
| TCIRG1   | Down | 0 | G0S2    | Up | 0 | MEGF11  | Up | 0 |
| HPX      | Down | 0 | GABRB2  | Up | 0 | TMEM1   |    |   |
|          |      |   |         |    |   | 20A     | Up | 0 |
|          |      |   |         |    |   | ACOT6   | Up | 0 |
|          |      |   |         |    |   | C330027 |    |   |
|          |      |   |         |    |   | C09RIK  | Up | 0 |
|          |      |   |         |    |   | SERINC  |    |   |
|          |      |   |         |    |   | 2       | Up | 0 |
|          |      |   |         |    |   | OTOP1   | Up | 0 |
|          |      |   |         |    |   | SEL1L3  | Up | 0 |
|          |      |   |         |    |   | AGPAT9  | Up | 0 |
|          |      |   |         |    |   | ADPRH   |    |   |
|          |      |   |         |    |   | L1      | Up | 0 |
|          |      |   |         |    |   | CCDC14  | Up | 0 |
|          |      |   |         |    |   | SERPIN  |    |   |
|          |      |   |         |    |   | B1C     | Up | 0 |
|          |      |   |         |    |   | PRUNE   | Up | 0 |
|          |      |   |         |    |   | RBMX2   | Up | 0 |

|          |      |   |         |    |   |         |    |   |
|----------|------|---|---------|----|---|---------|----|---|
| GBP3     | Down | 0 | SLC6A9  | Up | 0 | FITM2   | Up | 0 |
| ITIH4    | Down | 0 | GRN     | Up | 0 | DCUN1   | Up | 0 |
| ABCC6    | Down | 0 | GYK     | Up | 0 | D3      | Up | 0 |
| LGALS8   | Down | 0 | HADH    | Up | 0 | RCCD1   | Up | 0 |
| SELENBP2 | Down | 0 | HCN2    | Up | 0 | TDRP    | Up | 0 |
| FMN2     | Down | 0 | HELLS   | Up | 0 | UBTD2   | Up | 0 |
| HGFAC    | Down | 0 | HMGB3   | Up | 0 | IBA57   | Up | 0 |
| HES6     | Down | 0 | HMGCL   | Up | 0 | FAM73A  | Up | 0 |
| GRASP    | Down | 0 | HMGCS2  | Up | 0 | IMPG2   | Up | 0 |
| CXCL14   | Down | 0 | HSD17B4 | Up | 0 | CDH22   | Up | 0 |
| EXTL1    | Down | 0 | HSPA2   | Up | 0 | PTRH2   | Up | 0 |
| WSB1     | Down | 0 | HSPE1   | Up | 0 | FANCB   | Up | 0 |
| SLC22A4  | Down | 0 | HYAL1   | Up | 0 | MDFIC   | Up | 0 |
| TLE2     | Down | 0 | IDUA    | Up | 0 | TRPM4   | Up | 0 |
| NUPR1    | Down | 0 | IMPACT  | Up | 0 | TMEM6   | Up | 0 |
| SLC2A5   | Down | 0 | INHBE   | Up | 0 | 5       | Up | 0 |
| IKBKE    | Down | 0 | INPP1   | Up | 0 | NAV2    | Up | 0 |
| DUSP14   | Down | 0 | ITGA2   | Up | 0 | ACAD11  | Up | 0 |
| CYP2D22  | Down | 0 | ITGA6   | Up | 0 | D330045 | Up | 0 |
| PDE4B    | Down | 0 | JRK     | Up | 0 | A20RIK  | Up | 0 |
| SULT1B1  | Down | 0 | LAMB3   | Up | 0 | CHCHD   | Up | 0 |
| B3GALNT1 | Down | 0 | ANPEP   | Up | 0 | 10      | Up | 0 |
| B3GALT1  | Down | 0 | LPL     | Up | 0 | ALS2CR  | Up | 0 |
| SLCO1B2  | Down | 0 | MCM3    | Up | 0 | 12      | Up | 0 |
| SULT5A1  | Down | 0 | MCM2    | Up | 0 | FAM73B  | Up | 0 |
| SRSF4    | Down | 0 | MCM4    | Up | 0 | TMEM1   | Up | 0 |
| ABCB11   | Down | 0 | MCM5    | Up | 0 | 39      | Up | 0 |
| FABP7    | Down | 0 | MCM6    | Up | 0 | LRRC39  | Up | 0 |
| CXCL10   | Down | 0 | MCM7    | Up | 0 | SPTLC3  | Up | 0 |
| EVC      | Down | 0 | SMCP    | Up | 0 | LRFN3   | Up | 0 |
| PIWIL2   | Down | 0 | MEIG1   | Up | 0 | SLC35G  | Up | 0 |
| SH2D2A   | Down | 0 | ME1     | Up | 0 | 1       | Up | 0 |
| TTYH1    | Down | 0 | MDH2    | Up | 0 | TMEM2   | Up | 0 |
| CRYBB3   | Down | 0 | MPP1    | Up | 0 | 45      | Up | 0 |
| RSAD2    | Down | 0 | MTNR1A  | Up | 0 | CLSPN   | Up | 0 |
| HYOU1    | Down | 0 | GADD45B | Up | 0 | OSCAR   | Up | 0 |
|          |      |   |         |    |   | RAPGEF  | Up | 0 |
|          |      |   |         |    |   | 5       | Up | 0 |
|          |      |   |         |    |   | P3H4    | Up | 0 |
|          |      |   |         |    |   | 6430573 | Up | 0 |
|          |      |   |         |    |   | F11RIK  | Up | 0 |
|          |      |   |         |    |   | FSD1L   | Up | 0 |
|          |      |   |         |    |   | TOPBP1  | Up | 0 |
|          |      |   |         |    |   | TMCC3   | Up | 0 |
|          |      |   |         |    |   | A530016 | Up | 0 |
|          |      |   |         |    |   | L24RIK  | Up | 0 |
|          |      |   |         |    |   | EXOC6B  | Up | 0 |

|          |      |   |           |    |   |         |    |   |
|----------|------|---|-----------|----|---|---------|----|---|
| PRG4     | Down | 0 | MYO1C     | Up | 0 | GNAL    | Up | 0 |
| DEXI     | Down | 0 | NFE2L1    | Up | 0 | CENPT   | Up | 0 |
| CES1G    | Down | 0 | MAP4K4    | Up | 0 | ATP8B5  | Up | 0 |
| RNASE4   | Down | 0 | NMT2      | Up | 0 | STRIP2  | Up | 0 |
| BCO1     | Down | 0 | NXPH1     | Up | 0 | DAB1    | Up | 0 |
|          |      |   |           |    |   | TMEM1   |    |   |
| SMPD3    | Down | 0 | P2RY1     | Up | 0 | 54      | Up | 0 |
| SQRDL    | Down | 0 | PCTP      | Up | 0 | LRRN4   | Up | 0 |
|          |      |   |           |    |   | CYP4F3  |    |   |
| MOXD1    | Down | 0 | PDE1B     | Up | 0 | 9       | Up | 0 |
| DACT1    | Down | 0 | PEG3      | Up | 0 | SYNPO   | Up | 0 |
| SYT9     | Down | 0 | PFKFB1    | Up | 0 | SLC9A7  | Up | 0 |
| FN3K     | Down | 0 | ABCB4     | Up | 0 | TMTC2   | Up | 0 |
| FNDC4    | Down | 0 | PITX3     | Up | 0 | PSAT1   | Up | 0 |
| CYP4F14  | Down | 0 | SERPINE1  | Up | 0 | ACAA2   | Up | 0 |
| SLC15A3  | Down | 0 | PRIM1     | Up | 0 | ZFP3    | Up | 0 |
| APOC3    | Down | 0 | PSMB4     | Up | 0 | SUN3    | Up | 0 |
| GPM6B    | Down | 0 | PSMC3IP   | Up | 0 | CCDC73  | Up | 0 |
| H2-Q8    | Down | 0 | PSMD4     | Up | 0 | TUSC5   | Up | 0 |
| KNG1     | Down | 0 | PTGFR     | Up | 0 | EME1    | Up | 0 |
| C1RA     | Down | 0 | PVRL2     | Up | 0 | ESYT3   | Up | 0 |
| ETHE1    | Down | 0 | ABCD3     | Up | 0 | MED12L  | Up | 0 |
| CML1     | Down | 0 | RAD51AP1  | Up | 0 | TGM4    | Up | 0 |
| BMYC     | Down | 0 | RAET1A    | Up | 0 | AIFM2   | Up | 0 |
| RTP4     | Down | 0 | RAET1B    | Up | 0 | FA2H    | Up | 0 |
| TMEM86B  | Down | 0 | RAET1C    | Up | 0 | AMIGO2  | Up | 0 |
|          |      |   |           |    |   | HIST2H  |    |   |
| CTNNBIP1 | Down | 0 | RDH16     | Up | 0 | 3C1     | Up | 0 |
| AOX3     | Down | 0 | RPIA      | Up | 0 | CXCR1   | Up | 0 |
| CYP2D40  | Down | 0 | RRM1      | Up | 0 | CIDEC   | Up | 0 |
| UBA7     | Down | 0 | RRM2      | Up | 0 | ZSWIM3  | Up | 0 |
| ICAM4    | Down | 0 | S100A10   | Up | 0 | GALE    | Up | 0 |
|          |      |   |           |    |   | ZDHHC   |    |   |
| PDE6H    | Down | 0 | SCD1      | Up | 0 | 2       | Up | 0 |
|          |      |   |           |    |   | NANOS   |    |   |
| HDAC9    | Down | 0 | ST3GAL2   | Up | 0 | 1       | Up | 0 |
|          |      |   | ST6GALNAC |    |   |         |    |   |
| CYP27A1  | Down | 0 | 2         | Up | 0 | NRG1    | Up | 0 |
| CYP4F16  | Down | 0 | ST8SIA3   | Up | 0 | RNF24   | Up | 0 |
| NUDT7    | Down | 0 | STIL      | Up | 0 | THEMIS  | Up | 0 |
| HAAO     | Down | 0 | SLC16A1   | Up | 0 | SLC35F1 | Up | 0 |
| TCTEX1D2 | Down | 0 | SPRR1A    | Up | 0 | COQ4    | Up | 0 |
| IFITM3   | Down | 0 | TEAD1     | Up | 0 | PRRG4   | Up | 0 |
| FBXO36   | Down | 0 | TCTB      | Up | 0 | NCEH1   | Up | 0 |
| ARL4D    | Down | 0 | TGM2      | Up | 0 | DCTD    | Up | 0 |
| THEM5    | Down | 0 | TGM3      | Up | 0 | FAR2    | Up | 0 |

|           |      |   |         |    |   |         |    |   |
|-----------|------|---|---------|----|---|---------|----|---|
| TMEM218   | Down | 0 | RAN     | Up | 0 | ACAD12  | Up | 0 |
| ACOT11    | Down | 0 | TPM2    | Up | 0 | GINS2   | Up | 0 |
| RDM1      | Down | 0 | TGOLN1  | Up | 0 | ADCK2   | Up | 0 |
| COL27A1   | Down | 0 | TGOLN2  | Up | 0 | HADHA   | Up | 0 |
| ACADSB    | Down | 0 | TUBB2A  | Up | 0 | TMEM5   |    |   |
| PROZ      | Down | 0 | UCP3    | Up | 0 | 6       | Up | 0 |
| HMG3      | Down | 0 | UPP1    | Up | 0 | ARHGA   |    |   |
| LRP2BP    | Down | 0 | WNT11   | Up | 0 | P11A    | Up | 0 |
| DYX1C1    | Down | 0 | WNT5A   | Up | 0 | FFAR4   | Up | 0 |
| ALDH3B1   | Down | 0 | ADIPOQ  | Up | 0 | GPR135  | Up | 0 |
| IAH1      | Down | 0 | ADAM11  | Up | 0 | TMEM5   |    |   |
| TCTN2     | Down | 0 | ADH7    | Up | 0 | 9L      | Up | 0 |
| SERPINA1  |      |   |         |    |   | A430033 |    |   |
| 2         | Down | 0 | ANXA5   | Up | 0 | K04RIK  | Up | 0 |
| PPP1R14A  | Down | 0 | BRCA2   | Up | 0 | KIF20B  | Up | 0 |
| ZFP579    | Down | 0 | CAPN2   | Up | 0 | DSCC1   | Up | 0 |
| LRRC16A   | Down | 0 | CAR2    | Up | 0 | TONSL   | Up | 0 |
| PDGFRL    | Down | 0 | CASP8   | Up | 0 | PLD6    | Up | 0 |
| HAGHL     | Down | 0 | CCNA2   | Up | 0 | COX6B2  | Up | 0 |
| CHAC1     | Down | 0 | CCT3    | Up | 0 | COX19   | Up | 0 |
| SULT1C2   | Down | 0 | CD24A   | Up | 0 | SCYL2   | Up | 0 |
| GSDMD     | Down | 0 | CDC45   | Up | 0 | FERMT1  | Up | 0 |
| C1QTNF2   | Down | 0 | CPT1B   | Up | 0 | BHLHB9  | Up | 0 |
| ERP27     | Down | 0 | CPT2    | Up | 0 | RAET1E  | Up | 0 |
| SAT2      | Down | 0 | CYP4A10 | Up | 0 | PAQR9   | Up | 0 |
| ENHO      | Down | 0 | DAPK2   | Up | 0 | IGSF21  | Up | 0 |
| RPAIN     | Down | 0 | ECI1    | Up | 0 | C2CD4C  | Up | 0 |
| 1810046K0 |      |   |         |    |   | CASC4   | Up | 0 |
| 7RIK      | Down | 0 | DNASE1  | Up | 0 | IFNK    | Up | 0 |
| MCM10     | Down | 0 | RHBDF1  | Up | 0 | UNC93A  | Up | 0 |
| SDR9C7    | Down | 0 | KHDRBS3 | Up | 0 | DOT1L   | Up | 0 |
| METTL7A1  | Down | 0 | FABP3   | Up | 0 | MMS22   |    |   |
| CD209G    | Down | 0 | FCGRT   | Up | 0 | L       | Up | 0 |
| AFAP1     | Down | 0 | FPGS    | Up | 0 | CTIF    | Up | 0 |
| IYD       | Down | 0 | GPD1    | Up | 0 | NEIL2   | Up | 0 |
| ALDH1L1   | Down | 0 | GPD2    | Up | 0 | CYP4A3  |    |   |
| DCLK2     | Down | 0 | GNGT1   | Up | 0 | 1       | Up | 0 |
| ARRDC2    | Down | 0 | GSTT2   | Up | 0 | UGT1A1  | Up | 0 |
| LDHD      | Down | 0 | HSPD1   | Up | 0 | CHRM2   | Up | 0 |
|           |      |   |         |    |   | CCDC12  |    |   |
|           |      |   |         |    |   | 0       | Up | 0 |
|           |      |   |         |    |   | UGT3A1  | Up | 0 |
|           |      |   |         |    |   | RCAN2   | Up | 0 |
|           |      |   |         |    |   | MARVE   |    |   |
|           |      |   |         |    |   | LD3     | Up | 0 |

|            |      |   |          |    |   |          |    |   |
|------------|------|---|----------|----|---|----------|----|---|
| SNTG1      | Down | 0 | HSPA1B   | Up | 0 | Sept5    | Up | 0 |
| CYP2U1     | Down | 0 | HSP90AA1 | Up | 0 | XIST     | Up | 0 |
| IZUMO4     | Down | 0 | SLC6A4   | Up | 0 | GM5088   | Up | 0 |
| IFIH1      | Down | 0 | ID1      | Up | 0 | DIO3OS   | Up | 0 |
| RARRES2    | Down | 0 | ITGA4    | Up | 0 | NEAT1    | Up | 0 |
| SLC46A3    | Down | 0 | KCNAB1   | Up | 0 | ATP10D   | Up | 0 |
| SELO       | Down | 0 | KCNK3    | Up | 0 | CHKBC    |    |   |
| ETNPPL     | Down | 0 | FABP5    | Up | 0 | PT1B     | Up | 0 |
| 1300017J02 |      |   |          |    |   | CDK3-    |    |   |
| RIK        | Down | 0 | LAMC1    | Up | 0 | PS       | Up | 0 |
| SERPINA9   | Down | 0 | LEPR     | Up | 0 | B430010  |    |   |
| F11        | Down | 0 | LGALS4   | Up | 0 | I23RIK   | Up | 0 |
| CYP2C55    | Down | 0 | LGALS6   | Up | 0 | A330069  |    |   |
| UGT2A3     | Down | 0 | LIG1     | Up | 0 | E16RIK   | Up | 0 |
| ALDH1B1    | Down | 0 | LMO4     | Up | 0 | C230091  |    |   |
| TTC39C     | Down | 0 | LY6D     | Up | 0 | D08RIK   | Up | 0 |
| 3110082I17 |      |   |          |    |   | A330040  |    |   |
| RIK        | Down | 0 | MID1     | Up | 0 | F15RIK   | Up | 0 |
| 1700049G1  |      |   |          |    |   | 1700008J |    |   |
| 7RIK       | Down | 0 | MTHFR    | Up | 0 | 07RIK    | Up | 0 |
| STRA6L     | Down | 0 | MYOM1    | Up | 0 | GM1063   |    |   |
| PAQR8      | Down | 0 | NCK2     | Up | 0 | 8        | Up | 0 |
| IQCE       | Down | 0 | NEK2     | Up | 0 | 1700020  |    |   |
| TMC5       | Down | 0 | ORC1     | Up | 0 | N01RIK   | Up | 0 |
| SNX29      | Down | 0 | HSPA4L   | Up | 0 | GM1001   |    |   |
| PPP4R4     | Down | 0 | PDE4D    | Up | 0 | 2        | Up | 0 |
| PYROXD2    | Down | 0 | PEX11A   | Up | 0 | 2310068J |    |   |
| RSPH9      | Down | 0 | ABCB1B   | Up | 0 | 16RIK    | Up | 0 |
| TMEM14A    | Down | 0 | PLTP     | Up | 0 | PNPLA2   | Up | 0 |
| APOL7A     | Down | 0 | POLD1    | Up | 0 | D430020  |    |   |
| AP3M2      | Down | 0 | POLE     | Up | 0 | J02RIK   | Up | 0 |
|            |      |   |          |    |   | GM1006   |    |   |
|            |      |   |          |    |   | 9        | Up | 0 |
|            |      |   |          |    |   | GM1576   |    |   |
|            |      |   |          |    |   | 0        | Up | 0 |
|            |      |   |          |    |   | 3930402  |    |   |
|            |      |   |          |    |   | G23RIK   | Up | 0 |
|            |      |   |          |    |   | B430212  |    |   |
|            |      |   |          |    |   | C06RIK   | Up | 0 |
|            |      |   |          |    |   | BC03136  |    |   |
|            |      |   |          |    |   | 1        | Up | 0 |
|            |      |   |          |    |   | E030024  |    |   |
|            |      |   |          |    |   | N20RIK   | Up | 0 |
|            |      |   |          |    |   | GM1079   |    |   |
|            |      |   |          |    |   | 0        | Up | 0 |
|            |      |   |          |    |   | 1700048  |    |   |
|            |      |   |          |    |   | O20RIK   | Up | 0 |
|            |      |   |          |    |   | D330041  |    |   |
|            |      |   |          |    |   | H03RIK   | Up | 0 |



|                       |      |   |          |    |   |                    |    |   |
|-----------------------|------|---|----------|----|---|--------------------|----|---|
| GBP8                  | Down | 0 | POLE2    | Up | 0 | AI50759<br>7       | Up | 0 |
| ZFP773                | Down | 0 | POU4F1   | Up | 0 | 4632428<br>C04RIK  | Up | 0 |
| ABHD14B               | Down | 0 | PRKDC    | Up | 0 | MIR3091<br>1300002 | Up | 0 |
| UPP2                  | Down | 0 | PRTN3    | Up | 0 | E11RIK<br>9330159  | Up | 0 |
| FAM81A                | Down | 0 | PSAP     | Up | 0 | M07RIK<br>GM1566   | Up | 0 |
| IFI27L2A<br>2310014L1 | Down | 0 | PTGFRN   | Up | 0 | 3<br>1700023       | Up | 0 |
| 7RIK                  | Down | 0 | RAD51    | Up | 0 | L04RIK<br>CTCFLO   | Up | 0 |
| CNRIP1                | Down | 0 | RAD51D   | Up | 0 | S<br>9430091       | Up | 0 |
| CCDC151               | Down | 0 | SCNN1G   | Up | 0 | E24RIK<br>B130034  | Up | 0 |
| CRYL1                 | Down | 0 | SHCBP1   | Up | 0 | C11RIK<br>GM1544   | Up | 0 |
| AK7                   | Down | 0 | SLC16A7  | Up | 0 | 1<br>GM1540        | Up | 0 |
| ABCG3                 | Down | 0 | SLC22A3  | Up | 0 | 1<br>GM1961        | Up | 0 |
| AKR1C6                | Down | 0 | SLC22A5  | Up | 0 | 9<br>AV0511        | Up | 0 |
| SLCO1A4               | Down | 0 | SOX9     | Up | 0 | 73<br>1700027J     | Up | 0 |
| F13B                  | Down | 0 | SYCP3    | Up | 0 | 07RIK<br>4931402   | Up | 0 |
| MUP1                  | Down | 0 | TIMELESS | Up | 0 | G19RIK<br>C130083  | Up | 0 |
| REN1                  | Down | 0 | TOP2A    | Up | 0 | M11RIK<br>9430037  | Up | 0 |
| REN2                  | Down | 0 | TRAIP    | Up | 0 | G07RIK<br>4930556  | Up | 0 |
| CDO1                  | Down | 0 | UCP2     | Up | 0 | M19RIK<br>2310039  | Up | 0 |
| NGFR                  | Down | 0 | UCK1     | Up | 0 | L15RIK<br>2410003  | Up | 0 |
| OAS1C                 | Down | 0 | UNC119   | Up | 0 | L11RIK<br>4930413  | Up | 0 |
| MPV17L                | Down | 0 | VNN1     | Up | 0 | G21RIK<br>C330022  | Up | 0 |
| DQX1                  | Down | 0 | TRPV2    | Up | 0 | C24RIK<br>FAM219   | Up | 0 |
| CELA1                 | Down | 0 | BACE1    | Up | 0 | AOS<br>GM1086      | Up | 0 |
| PDE6C                 | Down | 0 | XCR1     | Up | 0 | 5<br>9530080       | Up | 0 |
| NREP                  | Down | 0 | IMPDH1   | Up | 0 | O11RIK             | Up | 0 |

|         |      |   |         |    |   |         |    |   |
|---------|------|---|---------|----|---|---------|----|---|
| CLEC2H  | Down | 0 | MAB21L2 | Up | 0 | GM4890  | Up | 0 |
| HRG     | Down | 0 | MGLL    | Up | 0 | GM5420  | Up | 0 |
| S1PR5   | Down | 0 | TENM3   | Up | 0 | GM1976  | Up | 0 |
| GPR98   | Down | 0 | ECI2    | Up | 0 | GM1067  |    |   |
| SLC13A3 | Down | 0 | SGCB    | Up | 0 | 7       | Up | 0 |
| ACSM1   | Down | 0 | SGCG    | Up | 0 | 4930506 |    |   |
| STEAP4  | Down | 0 | SRP54A  | Up | 0 | C21RIK  | Up | 0 |
| HNMT    | Down | 0 | ABCG2   | Up | 0 | STXBP3  |    |   |
| BAIAP2  | Down | 0 | DECR2   | Up | 0 | B       | Up | 0 |
| DNAH5   | Down | 0 | MAPK13  | Up | 0 | MIR7676 |    |   |
|         |      |   |         |    |   | -1      | Up | 0 |
|         |      |   |         |    |   | MIR7676 |    |   |
|         |      |   |         |    |   | -2      | Up | 0 |
|         |      |   |         |    |   | MIR8093 | Up | 0 |
|         |      |   |         |    |   | RPL14-  |    |   |
|         |      |   |         |    |   | PS1     | Up | 0 |
|         |      |   |         |    |   | GM1600  | Up | 0 |
