# Supplementary material for: Long non-coding RNA Gm15441 attenuates hepatic inflammasome activation in response to PPARA agonism and fasting
Source: PubMed Central journal article supplement (PMC7673042; doi:10.1038/s41467-020-19554-7), 2020-11-17
Supplement: 41467_2020_19554_MOESM4_ESM.pdf [file 41467_2020_19554_MOESM4_ESM.pdf]

**Supplementary Data 2. Differential expression analysis of lncRNA genes.**

WY, WY-14643; Resp, Response; WT, *Ppara*<sup>+/+</sup>; KO, *Ppara*<sup>-/-</sup>

|                       | <b>WY<br/>Response<br/>in WT<br/>liver (246<br/>Up, 202<br/>down)</b> | <b>WY<br/>Response<br/>in KO<br/>liver (16<br/>Up, 5<br/>down)</b> |                       | <b>WY<br/>Response<br/>in WT<br/>liver (246<br/>Up, 202<br/>down)</b> | <b>WY<br/>Response<br/>in KO<br/>liver (16<br/>Up, 5<br/>down)</b> |
|-----------------------|-----------------------------------------------------------------------|--------------------------------------------------------------------|-----------------------|-----------------------------------------------------------------------|--------------------------------------------------------------------|
| <b>LncRNA gene ID</b> | <b>Exp. No.<br/>338</b>                                               | <b>Exp. No.<br/>340</b>                                            | <b>LncRNA gene ID</b> | <b>Exp. No.<br/>338</b>                                               | <b>Exp. No.<br/>340</b>                                            |
| nc_intra_c9_8171      | Up                                                                    | 0                                                                  | nc_as_c19_14940       | Up                                                                    | 0                                                                  |
| nc_inter_cx_15495     | Up                                                                    | 0                                                                  | nc_as_c19_14847       | Up                                                                    | 0                                                                  |
| nc_inter_cx_15394     | Up                                                                    | 0                                                                  | nc_as_c19_14782       | Up                                                                    | 0                                                                  |
| nc_inter_c9_8301      | Up                                                                    | 0                                                                  | nc_as_c18_14687       | Up                                                                    | 0                                                                  |
| nc_inter_c9_8175      | Up                                                                    | 0                                                                  | nc_as_c18_14615       | Up                                                                    | 0                                                                  |
| nc_inter_c9_8164      | Up                                                                    | 0                                                                  | nc_as_c18_14384       | Up                                                                    | 0                                                                  |
| nc_inter_c9_8158      | Up                                                                    | 0                                                                  | nc_as_c17_14041       | Up                                                                    | 0                                                                  |
| nc_inter_c9_8136      | Up                                                                    | 0                                                                  | nc_as_c17_13916       | Up                                                                    | 0                                                                  |
| nc_inter_c9_8122      | Up                                                                    | 0                                                                  | nc_as_c17_13877       | Up                                                                    | 0                                                                  |
| nc_inter_c9_8081      | Up                                                                    | 0                                                                  | nc_as_c17_13822       | Up                                                                    | 0                                                                  |
| nc_inter_c9_7993      | Up                                                                    | 0                                                                  | nc_as_c15_12907       | Up                                                                    | 0                                                                  |
| nc_inter_c9_7992      | Up                                                                    | 0                                                                  | nc_as_c15_12840       | Up                                                                    | 0                                                                  |
| nc_inter_c9_7991      | Up                                                                    | 0                                                                  | nc_as_c14_12017       | Up                                                                    | 0                                                                  |
| nc_inter_c9_7989      | Up                                                                    | 0                                                                  | nc_as_c13_11451       | Up                                                                    | Up                                                                 |
| nc_inter_c9_7986      | Up                                                                    | 0                                                                  | nc_as_c13_11278       | Up                                                                    | 0                                                                  |
| nc_inter_c9_7908      | Up                                                                    | 0                                                                  | nc_as_c12_10896       | Up                                                                    | 0                                                                  |
| nc_inter_c9_7885      | Up                                                                    | 0                                                                  | nc_as_c10_9275        | Up                                                                    | 0                                                                  |
| nc_inter_c9_7791      | Up                                                                    | 0                                                                  | nc_as_c10_9064        | Up                                                                    | 0                                                                  |
| nc_inter_c8_7654      | Up                                                                    | 0                                                                  | nc_intra_c5_4738      | Down                                                                  | 0                                                                  |
| nc_inter_c8_7626      | Up                                                                    | 0                                                                  | nc_intra_c12_10888    | Down                                                                  | 0                                                                  |
| nc_inter_c8_7612      | Up                                                                    | 0                                                                  | nc_intra_c12_10886    | Down                                                                  | 0                                                                  |
| nc_inter_c8_7518      | Up                                                                    | 0                                                                  | nc_intra_c12_10870    | Down                                                                  | 0                                                                  |
| nc_inter_c8_7511      | Up                                                                    | 0                                                                  | nc_intra_c12_10859    | Down                                                                  | 0                                                                  |
| nc_inter_c8_7420      | Up                                                                    | 0                                                                  | nc_intra_c12_10856    | Down                                                                  | 0                                                                  |
| nc_inter_c8_7286      | Up                                                                    | 0                                                                  | nc_intra_c12_10851    | Down                                                                  | 0                                                                  |
| nc_inter_c8_7211      | Up                                                                    | 0                                                                  | nc_intra_c12_10508    | Down                                                                  | 0                                                                  |
| nc_inter_c8_7169      | Up                                                                    | 0                                                                  | nc_intra_c1_613       | Down                                                                  | 0                                                                  |
| nc_inter_c8_7105      | Up                                                                    | 0                                                                  | nc_intra_c1_611       | Down                                                                  | 0                                                                  |
| nc_inter_c8_6876      | Up                                                                    | 0                                                                  | nc_intra_c1_604       | Down                                                                  | 0                                                                  |
| nc_inter_c8_6744      | Up                                                                    | 0                                                                  | nc_inter_c9_8132      | Down                                                                  | 0                                                                  |
| nc_inter_c8_6743      | Up                                                                    | 0                                                                  | nc_inter_c9_7994      | Down                                                                  | 0                                                                  |
| nc_inter_c8_6742      | Up                                                                    | 0                                                                  | nc_inter_c9_7951      | Down                                                                  | 0                                                                  |

|                  |    |   |                  |      |    |
|------------------|----|---|------------------|------|----|
| nc_inter_c7_6558 | Up | 0 | nc_inter_c9_7809 | Down | 0  |
| nc_inter_c7_6402 | Up | 0 | nc_inter_c8_7430 | Down | 0  |
| nc_inter_c7_6308 | Up | 0 | nc_inter_c8_7423 | Down | 0  |
| nc_inter_c7_6195 | Up | 0 | nc_inter_c8_7012 | Down | 0  |
| nc_inter_c7_5993 | Up | 0 | nc_inter_c8_6977 | Down | 0  |
| nc_inter_c6_5845 | Up | 0 | nc_inter_c8_6942 | Down | 0  |
| nc_inter_c6_5816 | Up | 0 | nc_inter_c8_6896 | Down | Up |
| nc_inter_c6_5700 | Up | 0 | nc_inter_c8_6881 | Down | 0  |
| nc_inter_c6_5612 | Up | 0 | nc_inter_c7_6679 | Down | 0  |
| nc_inter_c6_5543 | Up | 0 | nc_inter_c7_6220 | Down | 0  |
| nc_inter_c6_5475 | Up | 0 | nc_inter_c7_6113 | Down | 0  |
| nc_inter_c6_5429 | Up | 0 | nc_inter_c7_6079 | Down | 0  |
| nc_inter_c6_4996 | Up | 0 | nc_inter_c7_6073 | Down | 0  |
| nc_inter_c6_4853 | Up | 0 | nc_inter_c7_6022 | Down | 0  |
| nc_inter_c5_4791 | Up | 0 | nc_inter_c6_5650 | Down | 0  |
| nc_inter_c5_4654 | Up | 0 | nc_inter_c6_5556 | Down | 0  |
| nc_inter_c5_4550 | Up | 0 | nc_inter_c6_5551 | Down | 0  |
| nc_inter_c5_4482 | Up | 0 | nc_inter_c6_5402 | Down | 0  |
| nc_inter_c5_4476 | Up | 0 | nc_inter_c6_5376 | Down | 0  |
| nc_inter_c5_4379 | Up | 0 | nc_inter_c6_5368 | Down | 0  |
| nc_inter_c5_4366 | Up | 0 | nc_inter_c6_5322 | Down | 0  |
| nc_inter_c5_4225 | Up | 0 | nc_inter_c6_5316 | Down | 0  |
| nc_inter_c5_4189 | Up | 0 | nc_inter_c6_5118 | Down | 0  |
| nc_inter_c5_4065 | Up | 0 | nc_inter_c5_4819 | Down | 0  |
| nc_inter_c5_4063 | Up | 0 | nc_inter_c5_4784 | Down | 0  |
| nc_inter_c4_3860 | Up | 0 | nc_inter_c5_4777 | Down | 0  |
| nc_inter_c4_3784 | Up | 0 | nc_inter_c5_4639 | Down | 0  |
| nc_inter_c4_3782 | Up | 0 | nc_inter_c5_4578 | Down | 0  |
| nc_inter_c4_3721 | Up | 0 | nc_inter_c5_4343 | Down | 0  |
| nc_inter_c4_3651 | Up | 0 | nc_inter_c5_4338 | Down | 0  |
| nc_inter_c4_3618 | Up | 0 | nc_inter_c5_4069 | Down | 0  |
| nc_inter_c4_3574 | Up | 0 | nc_inter_c5_4066 | Down | 0  |
| nc_inter_c4_3562 | Up | 0 | nc_inter_c5_3988 | Down | 0  |
| nc_inter_c4_3525 | Up | 0 | nc_inter_c4_3731 | Down | 0  |
| nc_inter_c4_3380 | Up | 0 | nc_inter_c4_3468 | Down | 0  |
| nc_inter_c4_3203 | Up | 0 | nc_inter_c4_3295 | Down | 0  |
| nc_inter_c4_3142 | Up | 0 | nc_inter_c4_3294 | Down | 0  |
| nc_inter_c4_3047 | Up | 0 | nc_inter_c4_3282 | Down | 0  |
| nc_inter_c3_2990 | Up | 0 | nc_inter_c4_3228 | Down | 0  |
| nc_inter_c3_2791 | Up | 0 | nc_inter_c4_3079 | Down | 0  |
| nc_inter_c3_2790 | Up | 0 | nc_inter_c3_2887 | Down | 0  |
| nc_inter_c3_2789 | Up | 0 | nc_inter_c3_2798 | Down | 0  |
| nc_inter_c3_2783 | Up | 0 | nc_inter_c3_2779 | Down | 0  |
| nc_inter_c3_2335 | Up | 0 | nc_inter_c3_2676 | Down | 0  |

|                    |    |    |                    |      |   |
|--------------------|----|----|--------------------|------|---|
| nc_inter_c3_2334   | Up | 0  | nc_inter_c3_2663   | Down | 0 |
| nc_inter_c3_2331   | Up | 0  | nc_inter_c3_2639   | Down | 0 |
| nc_inter_c3_2207   | Up | 0  | nc_inter_c3_2504   | Down | 0 |
| nc_inter_c2_2086   | Up | 0  | nc_inter_c3_2431   | Down | 0 |
| nc_inter_c2_2085   | Up | 0  | nc_inter_c3_2169   | Down | 0 |
| nc_inter_c2_2017   | Up | Up | nc_inter_c3_2168   | Down | 0 |
| nc_inter_c2_2016   | Up | Up | nc_inter_c3_2167   | Down | 0 |
| nc_inter_c2_2015   | Up | 0  | nc_inter_c2_2066   | Down | 0 |
| nc_inter_c2_2010   | Up | 0  | nc_inter_c2_1990   | Down | 0 |
| nc_inter_c2_1986   | Up | 0  | nc_inter_c2_1889   | Down | 0 |
| nc_inter_c2_1822   | Up | 0  | nc_inter_c2_1887   | Down | 0 |
| nc_inter_c2_1760   | Up | 0  | nc_inter_c2_1830   | Down | 0 |
| nc_inter_c2_1594   | Up | 0  | nc_inter_c2_1782   | Down | 0 |
| nc_inter_c2_1570   | Up | 0  | nc_inter_c2_1302   | Down | 0 |
| nc_inter_c2_1549   | Up | 0  | nc_inter_c2_1236   | Down | 0 |
| nc_inter_c2_1548   | Up | 0  | nc_inter_c2_1235   | Down | 0 |
| nc_inter_c2_1481   | Up | 0  | nc_inter_c2_1233   | Down | 0 |
| nc_inter_c2_1289   | Up | 0  | nc_inter_c2_1232   | Down | 0 |
| nc_inter_c2_1211   | Up | 0  | nc_inter_c2_1157   | Down | 0 |
| nc_inter_c19_15186 | Up | 0  | nc_inter_c2_1156   | Down | 0 |
| nc_inter_c19_15132 | Up | 0  | nc_inter_c19_15097 | Down | 0 |
| nc_inter_c19_15080 | Up | 0  | nc_inter_c19_14990 | Down | 0 |
| nc_inter_c19_15058 | Up | 0  | nc_inter_c19_14965 | Down | 0 |
| nc_inter_c19_15025 | Up | 0  | nc_inter_c19_14954 | Down | 0 |
| nc_inter_c19_14999 | Up | 0  | nc_inter_c19_14803 | Down | 0 |
| nc_inter_c19_14947 | Up | 0  | nc_inter_c18_14678 | Down | 0 |
| nc_inter_c19_14908 | Up | 0  | nc_inter_c18_14525 | Down | 0 |
| nc_inter_c19_14822 | Up | 0  | nc_inter_c18_14341 | Down | 0 |
| nc_inter_c19_14746 | Up | 0  | nc_inter_c17_14189 | Down | 0 |
| nc_inter_c18_14683 | Up | 0  | nc_inter_c17_14182 | Down | 0 |
| nc_inter_c18_14650 | Up | 0  | nc_inter_c17_13938 | Down | 0 |
| nc_inter_c18_14649 | Up | 0  | nc_inter_c17_13843 | Down | 0 |
| nc_inter_c18_14647 | Up | 0  | nc_inter_c17_13742 | Down | 0 |
| nc_inter_c18_14646 | Up | 0  | nc_inter_c17_13576 | Down | 0 |
| nc_inter_c18_14446 | Up | 0  | nc_inter_c16_13433 | Down | 0 |
| nc_inter_c18_14376 | Up | 0  | nc_inter_c16_13348 | Down | 0 |
| nc_inter_c17_14163 | Up | 0  | nc_inter_c16_13316 | Down | 0 |
| nc_inter_c17_14140 | Up | 0  | nc_inter_c16_13177 | Down | 0 |
| nc_inter_c17_14002 | Up | 0  | nc_inter_c16_13176 | Down | 0 |
| nc_inter_c17_13918 | Up | 0  | nc_inter_c16_13173 | Down | 0 |
| nc_inter_c17_13842 | Up | 0  | nc_inter_c16_13171 | Down | 0 |
| nc_inter_c17_13841 | Up | 0  | nc_inter_c16_13170 | Down | 0 |
| nc_inter_c17_13787 | Up | 0  | nc_inter_c16_13161 | Down | 0 |
| nc_inter_c17_13783 | Up | 0  | nc_inter_c15_12319 | Down | 0 |

|                    |    |    |                    |      |      |
|--------------------|----|----|--------------------|------|------|
| nc_inter_c17_13749 | Up | 0  | nc_inter_c14_12304 | Down | 0    |
| nc_inter_c17_13666 | Up | 0  | nc_inter_c14_11949 | Down | 0    |
| nc_inter_c16_13525 | Up | 0  | nc_inter_c13_11768 | Down | 0    |
| nc_inter_c16_13491 | Up | 0  | nc_inter_c13_11670 | Down | Up   |
| nc_inter_c16_13488 | Up | 0  | nc_inter_c13_11669 | Down | 0    |
| nc_inter_c16_13475 | Up | 0  | nc_inter_c13_11385 | Down | Up   |
| nc_inter_c16_13349 | Up | 0  | nc_inter_c13_11227 | Down | 0    |
| nc_inter_c16_13232 | Up | 0  | nc_inter_c13_11212 | Down | 0    |
| nc_inter_c16_13225 | Up | 0  | nc_inter_c13_11104 | Down | 0    |
| nc_inter_c16_13190 | Up | 0  | nc_inter_c13_11046 | Down | Up   |
| nc_inter_c16_13081 | Up | 0  | nc_inter_c12_10922 | Down | Down |
| nc_inter_c16_13049 | Up | 0  | nc_inter_c12_10910 | Down | 0    |
| nc_inter_c15_12875 | Up | 0  | nc_inter_c12_10717 | Down | 0    |
| nc_inter_c15_12872 | Up | 0  | nc_inter_c12_10628 | Down | 0    |
| nc_inter_c15_12868 | Up | 0  | nc_inter_c12_10595 | Down | 0    |
| nc_inter_c15_12846 | Up | 0  | nc_inter_c12_10454 | Down | 0    |
| nc_inter_c15_12836 | Up | 0  | nc_inter_c11_9925  | Down | 0    |
| nc_inter_c15_12835 | Up | 0  | nc_inter_c11_9856  | Down | 0    |
| nc_inter_c15_12834 | Up | Up | nc_inter_c11_9511  | Down | 0    |
| nc_inter_c15_12833 | Up | 0  | nc_inter_c11_9434  | Down | 0    |
| nc_inter_c15_12642 | Up | 0  | nc_inter_c11_10078 | Down | 0    |
| nc_inter_c15_12606 | Up | 0  | nc_inter_c11_10021 | Down | 0    |
| nc_inter_c15_12538 | Up | 0  | nc_inter_c10_9394  | Down | 0    |
| nc_inter_c15_12530 | Up | 0  | nc_inter_c10_9264  | Down | 0    |
| nc_inter_c15_12529 | Up | 0  | nc_inter_c10_9210  | Down | 0    |
| nc_inter_c15_12514 | Up | 0  | nc_inter_c10_8829  | Down | 0    |
| nc_inter_c15_12451 | Up | 0  | nc_inter_c10_8794  | Down | 0    |
| nc_inter_c15_12365 | Up | 0  | nc_inter_c10_8746  | Down | 0    |
| nc_inter_c14_12199 | Up | 0  | nc_inter_c10_8471  | Down | Down |
| nc_inter_c14_12198 | Up | 0  | nc_inter_c1_838    | Down | 0    |
| nc_inter_c14_12188 | Up | 0  | nc_inter_c1_630    | Down | 0    |
| nc_inter_c14_12058 | Up | 0  | nc_inter_c1_610    | Down | 0    |
| nc_inter_c14_11978 | Up | 0  | nc_inter_c1_602    | Down | 0    |
| nc_inter_c14_11945 | Up | 0  | nc_inter_c1_591    | Down | 0    |
| nc_inter_c14_11942 | Up | 0  | nc_inter_c1_543    | Down | 0    |
| nc_inter_c13_11657 | Up | 0  | nc_inter_c1_425    | Down | 0    |
| nc_inter_c13_11628 | Up | 0  | nc_inter_c1_406    | Down | 0    |
| nc_inter_c13_11552 | Up | 0  | nc_inter_c1_278    | Down | 0    |
| nc_inter_c13_11399 | Up | 0  | nc_inter_c1_235    | Down | 0    |
| nc_inter_c13_11376 | Up | 0  | nc_inter_c1_1035   | Down | 0    |
| nc_inter_c13_11292 | Up | 0  | nc_as_c9_8401      | Down | 0    |
| nc_inter_c13_11254 | Up | 0  | nc_as_c9_7825      | Down | 0    |
| nc_inter_c13_11249 | Up | 0  | nc_as_c9_7767      | Down | 0    |
| nc_inter_c13_11216 | Up | 0  | nc_as_c8_7528      | Down | 0    |

|                    |    |      |                 |      |   |
|--------------------|----|------|-----------------|------|---|
| nc_inter_c13_11165 | Up | 0    | nc_as_c8_7521   | Down | 0 |
| nc_inter_c13_11049 | Up | 0    | nc_as_c7_6643   | Down | 0 |
| nc_inter_c12_10942 | Up | 0    | nc_as_c7_6546   | Down | 0 |
| nc_inter_c12_10672 | Up | Down | nc_as_c7_6302   | Down | 0 |
| nc_inter_c12_10286 | Up | 0    | nc_as_c7_6300   | Down | 0 |
| nc_inter_c12_10240 | Up | 0    | nc_as_c7_6166   | Down | 0 |
| nc_inter_c11_9993  | Up | 0    | nc_as_c7_6065   | Down | 0 |
| nc_inter_c11_9992  | Up | 0    | nc_as_c7_5950   | Down | 0 |
| nc_inter_c11_9965  | Up | 0    | nc_as_c7_5911   | Down | 0 |
| nc_inter_c11_9716  | Up | 0    | nc_as_c6_5124   | Down | 0 |
| nc_inter_c11_9626  | Up | 0    | nc_as_c5_4370   | Down | 0 |
| nc_inter_c11_9429  | Up | 0    | nc_as_c4_3452   | Down | 0 |
| nc_inter_c11_10143 | Up | 0    | nc_as_c4_3300   | Down | 0 |
| nc_inter_c11_10091 | Up | 0    | nc_as_c4_3298   | Down | 0 |
| nc_inter_c11_10029 | Up | 0    | nc_as_c4_3297   | Down | 0 |
| nc_inter_c10_9418  | Up | 0    | nc_as_c4_3207   | Down | 0 |
| nc_inter_c10_9313  | Up | 0    | nc_as_c3_2936   | Down | 0 |
| nc_inter_c10_9254  | Up | 0    | nc_as_c3_2800   | Down | 0 |
| nc_inter_c10_9251  | Up | 0    | nc_as_c3_2485   | Down | 0 |
| nc_inter_c10_9236  | Up | 0    | nc_as_c2_1652   | Down | 0 |
| nc_inter_c10_9177  | Up | 0    | nc_as_c2_1560   | Down | 0 |
| nc_inter_c10_9138  | Up | 0    | nc_as_c2_1457   | Down | 0 |
| nc_inter_c10_9059  | Up | 0    | nc_as_c2_1343   | Down | 0 |
| nc_inter_c10_8950  | Up | 0    | nc_as_c2_1133   | Down | 0 |
| nc_inter_c10_8868  | Up | 0    | nc_as_c19_15151 | Down | 0 |
| nc_inter_c10_8867  | Up | 0    | nc_as_c19_15130 | Down | 0 |
| nc_inter_c10_8866  | Up | 0    | nc_as_c19_14977 | Down | 0 |
| nc_inter_c10_8770  | Up | 0    | nc_as_c19_14968 | Down | 0 |
| nc_inter_c1_941    | Up | 0    | nc_as_c19_14916 | Down | 0 |
| nc_inter_c1_899    | Up | 0    | nc_as_c18_14443 | Down | 0 |
| nc_inter_c1_260    | Up | 0    | nc_as_c18_14332 | Down | 0 |
| nc_inter_c1_259    | Up | 0    | nc_as_c17_14065 | Down | 0 |
| nc_inter_c1_238    | Up | 0    | nc_as_c17_13901 | Down | 0 |
| nc_inter_c1_118    | Up | 0    | nc_as_c16_13310 | Down | 0 |
| nc_inter_c1_115    | Up | 0    | nc_as_c16_13273 | Down | 0 |
| nc_inter_c1_1032   | Up | 0    | nc_as_c16_13146 | Down | 0 |
| nc_as_c9_8393      | Up | 0    | nc_as_c16_13145 | Down | 0 |
| nc_as_c8_7281      | Up | 0    | nc_as_c15_12340 | Down | 0 |
| nc_as_c8_7185      | Up | 0    | nc_as_c14_12150 | Down | 0 |
| nc_as_c8_7071      | Up | 0    | nc_as_c13_11596 | Down | 0 |
| nc_as_c7_6542      | Up | 0    | nc_as_c13_11563 | Down | 0 |
| nc_as_c7_6493      | Up | 0    | nc_as_c13_11185 | Down | 0 |
| nc_as_c7_6192      | Up | 0    | nc_as_c13_11127 | Down | 0 |
| nc_as_c7_6021      | Up | 0    | nc_as_c12_10884 | Down | 0 |

|                 |    |   |                    |      |      |
|-----------------|----|---|--------------------|------|------|
| nc_as_c7_6009   | Up | 0 | nc_as_c12_10850    | Down | 0    |
| nc_as_c6_5250   | Up | 0 | nc_as_c11_9684     | Down | 0    |
| nc_as_c6_4824   | Up | 0 | nc_as_c11_10149    | Down | 0    |
| nc_as_c5_4655   | Up | 0 | nc_as_c11_10122    | Down | 0    |
| nc_as_c5_4325   | Up | 0 | nc_as_c10_8962     | Down | 0    |
| nc_as_c5_4085   | Up | 0 | nc_as_c10_8848     | Down | 0    |
| nc_as_c4_3435   | Up | 0 | nc_as_c10_8847     | Down | 0    |
| nc_as_c3_2781   | Up | 0 | nc_as_c10_8460     | Down | Up   |
| nc_as_c3_2732   | Up | 0 | nc_as_c1_798       | Down | 0    |
| nc_as_c3_2620   | Up | 0 | nc_as_c1_762       | Down | 0    |
| nc_as_c2_2065   | Up | 0 | nc_as_c1_504       | Down | 0    |
| nc_as_c2_1724   | Up | 0 | nc_as_c1_264       | Down | 0    |
| nc_as_c2_1665   | Up | 0 | nc_intra_c12_10883 | 0    | Up   |
| nc_as_c2_1309   | Up | 0 | nc_inter_c9_8350   | 0    | Down |
| nc_as_c2_1240   | Up | 0 | nc_inter_c8_7393   | 0    | Down |
| nc_as_c2_1101   | Up | 0 | nc_inter_c8_6943   | 0    | Up   |
| nc_as_c19_15090 | Up | 0 | nc_inter_c15_12684 | 0    | Up   |
| nc_as_c19_15060 | Up | 0 | nc_inter_c13_11523 | 0    | Up   |
| nc_as_c19_14973 | Up | 0 | nc_inter_c11_9650  | 0    | Up   |
| nc_as_c19_14966 | Up | 0 | nc_inter_c11_9631  | 0    | Up   |
|                 |    |   | nc as c11 9447     | 0    | Up   |
