# Supplementary material for: Long non-coding RNA Gm15441 attenuates hepatic inflammasome activation in response to PPARA agonism and fasting
Source: PubMed Central journal article supplement (PMC7673042; doi:10.1038/s41467-020-19554-7), 2020-11-17
Supplement: 41467_2020_19554_MOESM5_ESM.pdf [file 41467_2020_19554_MOESM5_ESM.pdf]

**Supplementary Data 3. LncRNAs responsive to activators of PPAR $\alpha$ , CAR, and PXR in mouse liver.**

Groups #1, #2: lncRNAs that are consistently induced, or consistently repressed, by all 3 nuclear receptors, as indicated; Groups #3, #4: lncRNAs consistently induced or repressed by PPAR $\alpha$  and by CAR, but not by PXR; Groups #5, #6: lncRNAs consistently induced or repressed by PPAR $\alpha$  and by PXR, but not by CAR; Groups #7, #8: lncRNAs induced or repressed by PPAR $\alpha$  but showing the opposite responses to activators of CAR, PXR, or both receptors. See Melia et al, 2019 for genomic coordinates and gene and isoform structures of lncRNAs. ‘Inter’, intergenic lncRNA; ‘as’, lncRNA that is anti-sense to a protein-coding gene; ‘intra’, lncRNA that is intragenic to, and transcribed from the same strand as a protein-coding gene but whose exons do not overlap those of the protein-coding gene.

| LncRNA gene ID     | PPAR $\alpha$ response | CAR response (male) | PXR response | Nuclear receptor response group # |
|--------------------|------------------------|---------------------|--------------|-----------------------------------|
| nc_inter_c15_12835 | Up                     | Up                  | Up           | 1                                 |
| nc_inter_c15_12836 | Up                     | Up                  | Up           | 1                                 |
| nc_inter_c19_14947 | Up                     | Up                  | Up           | 1                                 |
| nc_as_c5_4655      | Up                     | Up                  | Up           | 1                                 |
| nc_inter_c16_13225 | Up                     | Up                  | Up           | 1                                 |
| nc_inter_c5_4654   | Up                     | Up                  | Up           | 1                                 |
| nc_inter_c9_8301   | Up                     | Up                  | Up           | 1                                 |
| nc_inter_c4_3618   | Up                     | Up (F-only)         | Up           | 1                                 |
| nc_inter_c12_10910 | Down                   | Down (F-only)       | Down         | 2                                 |
| nc_inter_c16_13170 | Down                   | Down (F-only)       | Down         | 2                                 |
| nc_inter_c16_13177 | Down                   | Down (F-only)       | Down         | 2                                 |
| nc_inter_c7_6220   | Down                   | Down (F-only)       | Down         | 2                                 |
| nc_as_c2_1343      | Down                   | Down (F-only)       | Down         | 2                                 |
| nc_inter_c7_6113   | Down                   | Down (F-only)       | Down         | 2                                 |
| nc_inter_c5_4777   | Down                   | Down (F-only)       | Down         | 2                                 |
| nc_inter_c6_5551   | Down                   | Down (F-only)       | Down         | 2                                 |
| nc_inter_c6_5316   | Down                   | Down                | Down         | 2                                 |
| nc_as_c7_6065      | Down                   | Down                | Down         | 2                                 |
| nc_as_c19_14977    | Down                   | Down                | Down         | 2                                 |
| nc_as_c9_8393      | Up                     | Up                  | Down         | 3                                 |
| nc_inter_c13_11254 | Up                     | Up                  | Down         | 3                                 |
| nc_inter_c8_7511   | Up                     | Up                  | Down         | 3                                 |
| nc_as_c2_1101      | Up                     | Up                  | Down         | 3                                 |
| nc_inter_c19_14999 | Up                     | Up                  |              | 3                                 |
| nc_inter_c9_7791   | Up                     | Up                  |              | 3                                 |
| nc_as_c12_10896    | Up                     | Up                  |              | 3                                 |

|                    |      |               |      |   |
|--------------------|------|---------------|------|---|
| nc_inter_c15_12606 | Up   | Up            |      | 3 |
| nc_inter_c6_4853   | Up   | Up            |      | 3 |
| nc_as_c5_4325      | Up   | Up (F-only)   | Down | 3 |
| nc_inter_c10_9313  | Up   | Up (F-only)   | Down | 3 |
| nc_as_c7_6192      | Up   | Up (F-only)   |      | 3 |
| nc_as_c8_7071      | Up   | Up (F-only)   |      | 3 |
| nc_inter_c10_9254  | Up   | Up (F-only)   |      | 3 |
| nc_inter_c14_12058 | Up   | Up (F-only)   |      | 3 |
| nc_inter_c16_13190 | Up   | Up (F-only)   |      | 3 |
| nc_inter_c16_13349 | Up   | Up (F-only)   |      | 3 |
| nc_inter_c17_13841 | Up   | Up (F-only)   |      | 3 |
| nc_inter_c17_13842 | Up   | Up (F-only)   |      | 3 |
| nc_inter_c4_3142   | Up   | Up (F-only)   |      | 3 |
| nc_inter_c8_7169   | Up   | Up (F-only)   |      | 3 |
| nc_inter_c8_7612   | Up   | Up (F-only)   |      | 3 |
| nc_inter_c12_10672 | Up   | Up (F-only)   |      | 3 |
| nc_inter_c7_6073   | Down | Down (F-only) | Up   | 4 |
| nc_as_c12_10884    | Down | Down          | Up   | 4 |
| nc_inter_c9_7809   | Down | Down          | Up   | 4 |
| nc_inter_c13_11385 | Down | Down          | Up   | 4 |
| nc_inter_c11_9925  | Down | Down (F-only) |      | 4 |
| nc_inter_c16_13176 | Down | Down (F-only) |      | 4 |
| nc_inter_c3_2504   | Down | Down (F-only) |      | 4 |
| nc_inter_c4_3468   | Down | Down (F-only) |      | 4 |
| nc_inter_c8_7423   | Down | Down (F-only) |      | 4 |
| nc_inter_c8_7430   | Down | Down (F-only) |      | 4 |
| nc_inter_c10_9394  | Down | Down (F-only) |      | 4 |
| nc_inter_c11_10078 | Down | Down (F-only) |      | 4 |
| nc_inter_c15_12319 | Down | Down (F-only) |      | 4 |
| nc_inter_c2_1990   | Down | Down (F-only) |      | 4 |
| nc_inter_c5_3988   | Down | Down (F-only) |      | 4 |
| nc_inter_c9_7994   | Down | Down (F-only) |      | 4 |
| nc_as_c19_15130    | Down | Down (F-only) |      | 4 |
| nc_inter_c16_13173 | Down | Down          |      | 4 |
| nc_inter_c8_6942   | Down | Down          |      | 4 |
| nc_as_c3_2800      | Down | Down          |      | 4 |
| nc_inter_c5_4578   | Down | Down          |      | 4 |
| nc_as_c9_7767      | Down | Down          |      | 4 |
| nc_inter_c11_9965  | Up   | Down (F-only) | Up   | 5 |
| nc_inter_c11_10091 | Up   |               | Up   | 5 |
| nc_inter_c15_12833 | Up   |               | Up   | 5 |
| nc_inter_c17_13787 | Up   |               | Up   | 5 |
| nc_inter_c19_15058 | Up   |               | Up   | 5 |

|                    |      |               |      |   |
|--------------------|------|---------------|------|---|
| nc_inter_c2_2015   | Up   |               | Up   | 5 |
| nc_inter_c2_2085   | Up   |               | Up   | 5 |
| nc_inter_c3_2207   | Up   |               | Up   | 5 |
| nc_inter_c8_6742   | Up   |               | Up   | 5 |
| nc_inter_c8_6743   | Up   |               | Up   | 5 |
| nc_as_c10_8848     | Down |               | Down | 6 |
| nc_as_c11_10149    | Down |               | Down | 6 |
| nc_as_c2_1652      | Down |               | Down | 6 |
| nc_as_c5_4370      | Down |               | Down | 6 |
| nc_inter_c1_591    | Down |               | Down | 6 |
| nc_inter_c10_8829  | Down |               | Down | 6 |
| nc_inter_c13_11212 | Down |               | Down | 6 |
| nc_inter_c14_11949 | Down |               | Down | 6 |
| nc_inter_c16_13171 | Down |               | Down | 6 |
| nc_inter_c17_13938 | Down |               | Down | 6 |
| nc_inter_c19_14990 | Down |               | Down | 6 |
| nc_inter_c2_1302   | Down |               | Down | 6 |
| nc_inter_c2_1782   | Down |               | Down | 6 |
| nc_inter_c3_2798   | Down |               | Down | 6 |
| nc_inter_c4_3731   | Down |               | Down | 6 |
| nc_inter_c5_4066   | Down |               | Down | 6 |
| nc_inter_c5_4784   | Down |               | Down | 6 |
| nc_inter_c6_5322   | Down |               | Down | 6 |
| nc_inter_c7_6022   | Down |               | Down | 6 |
| nc_inter_c8_7012   | Down |               | Down | 6 |
| nc_inter_c9_8122   | Up   | Down (F-only) | Down | 7 |
| nc_inter_c10_9418  | Up   | Down (F-only) | Down | 7 |
| nc_inter_c2_1594   | Up   | Down (F-only) | Down | 7 |
| nc_inter_c9_7989   | Up   | Down (F-only) | Down | 7 |
| nc_inter_c14_11945 | Up   | Down (F-only) | Down | 7 |
| nc_inter_c9_7992   | Up   | Down (F-only) |      | 7 |
| nc_inter_c8_6744   | Up   | Down          | Up   | 7 |
| nc_inter_c14_12199 | Up   | Down          | Down | 7 |
| nc_inter_c15_12514 | Up   | Down          | Down | 7 |
| nc_inter_c4_3651   | Up   | Down          | Down | 7 |
| nc_as_c17_14041    | Up   | Down          |      | 7 |
| nc_as_c19_14782    | Up   | Down          |      | 7 |
| nc_inter_c19_15132 | Up   | Down          |      | 7 |
| nc_inter_c12_10942 | Up   | Down          |      | 7 |
| nc_inter_c9_7993   | Up   | Down          |      | 7 |
| nc_as_c3_2781      | Up   |               | Down | 7 |
| nc_as_c6_5250      | Up   |               | Down | 7 |
| nc_inter_c1_115    | Up   |               | Down | 7 |

|                    |      |             |      |   |
|--------------------|------|-------------|------|---|
| nc_inter_c1_238    | Up   |             | Down | 7 |
| nc_inter_c10_8950  | Up   |             | Down | 7 |
| nc_inter_c10_9138  | Up   |             | Down | 7 |
| nc_inter_c13_11216 | Up   |             | Down | 7 |
| nc_inter_c14_12198 | Up   |             | Down | 7 |
| nc_inter_c17_14163 | Up   |             | Down | 7 |
| nc_inter_c18_14650 | Up   |             | Down | 7 |
| nc_inter_c19_14822 | Up   |             | Down | 7 |
| nc_inter_c2_1481   | Up   |             | Down | 7 |
| nc_inter_c3_2790   | Up   |             | Down | 7 |
| nc_inter_c3_2791   | Up   |             | Down | 7 |
| nc_inter_c4_3380   | Up   |             | Down | 7 |
| nc_inter_c5_4065   | Up   |             | Down | 7 |
| nc_inter_c6_5429   | Up   |             | Down | 7 |
| nc_inter_c8_7105   | Up   |             | Down | 7 |
| nc_as_c10_8962     | Down | Up (F-only) |      | 8 |
| nc_as_c8_7521      | Down | Up (F-only) |      | 8 |
| nc_as_c8_7528      | Down | Up (F-only) |      | 8 |
| nc_intra_c5_4738   | Down | Up (F-only) |      | 8 |
| nc_inter_c10_9210  | Down | Up          | Up   | 8 |
| nc_inter_c5_4338   | Down | Up          | Up   | 8 |
| nc_inter_c8_6896   | Down | Up          | Up   | 8 |
| nc_as_c10_8460     | Down | Up          | Up   | 8 |
| nc_inter_c12_10454 | Down | Up          | Down | 8 |
| nc_as_c11_9684     | Down | Up          |      | 8 |
| nc_as_c16_13145    | Down | Up          |      | 8 |
| nc_inter_c1_630    | Down | Up          |      | 8 |
| nc_inter_c12_10628 | Down | Up          |      | 8 |
| nc_inter_c4_3294   | Down | Up          |      | 8 |
| nc_inter_c19_15097 | Down | Up          |      | 8 |
| nc_as_c13_11596    | Down | Up          |      | 8 |
| nc_as_c2_1457      | Down | Up          |      | 8 |
| nc_as_c9_8401      | Down | Up          |      | 8 |
| nc_inter_c3_2779   | Down | Up          |      | 8 |
| nc_inter_c6_5118   | Down | Up          |      | 8 |
| nc_intra_c1_604    | Down | Up          |      | 8 |
| nc_inter_c4_3282   | Down | Up          |      | 8 |
| nc_as_c7_6302      | Down | Up          |      | 8 |
| nc_inter_c2_1887   | Down |             | Up   | 8 |
| nc_inter_c3_2887   | Down |             | Up   | 8 |
| nc_inter_c4_3079   | Down |             | Up   | 8 |
